# Supplementary material for: Multiple long-range host shifts of major Wolbachia supergroups infecting arthropods
Source: Sci Rep. 2022 May 17;12:8131. doi: 10.1038/s41598-022-12299-x (PMC9114371; doi:10.1038/s41598-022-12299-x)
Supplement: Supplementary file 10 — Supplementary Table 4. [file 41598_2022_12299_MOESM10_ESM.xlsx]

## Sheet: Sheet1
Supplementary table 4.1 Supergroup A and B Wolbachia similarity table
wolb	Aalb_001	Cobl_002	Cobs_003	Dcoc_004	Dvir_005	Dvir_006	Dvir_007	Dvir_008	Dvir_009	Dvir_010	Dvir_011	Dvir_012	Dvir_013	Dvir_014	Dvir_015	Dvir_016	Dvir_017	Dvir_018	Dvir_019	Dvir_020	Dvir_021	Dvir_022	Dvir_023	Dvir_024	Dvir_025	Dvir_026	Dall_027	Dall_028	Dall_029	Dall_030	Dall_031	Dall_032	Dall_033	Dcit_034	Dcit_035	Dcit_036	Dcit_037	Dcit_038	Dcit_039	Dcit_040	Dcit_041	Dana_042	Dana_043	DrosMulti_044	Dana_045	Dana_046	Dana_047	Dana_048	Dana_049
Aalb_001	100	61	60	44	72	70	72	72	72	72	72	72	72	72	72	72	72	72	72	72	72	72	72	72	72	72	72	72	68	73	70	51	54	79	79	79	75	74	67	72	79	72	72	72	72	73	74	70	71
Cobl_002	61	100	63	34	80	78	80	80	80	80	80	80	80	80	80	80	80	80	80	80	80	80	79	80	80	80	81	79	73	80	80	57	51	74	73	74	70	69	66	61	73	81	81	81	81	82	75	79	81
Cobs_003	60	63	100	48	66	64	66	66	66	66	66	66	66	66	66	66	66	66	65	66	66	66	65	66	66	66	67	65	61	67	65	47	56	61	62	61	58	62	54	56	62	67	67	67	67	68	62	65	66
Dcoc_004	44	34	48	100	29	32	30	29	29	29	29	29	29	29	29	29	29	29	29	29	29	29	30	29	29	29	30	35	37	30	32	47	41	30	30	30	34	35	47	51	30	29	29	29	29	31	31	31	32
Dvir_005	72	80	66	29	100	97	100	100	100	100	100	100	100	100	100	100	100	100	99	100	100	100	99	100	100	100	97	91	89	97	94	60	61	88	88	88	85	83	63	66	88	97	97	97	97	95	90	95	93
Dvir_006	70	78	64	32	97	100	97	97	97	97	97	97	97	97	97	97	97	97	96	97	97	97	96	97	97	97	94	89	87	94	91	58	59	86	86	86	88	85	61	63	86	94	94	94	94	92	87	92	92
Dvir_007	72	80	66	30	100	97	100	100	100	100	100	100	100	99	100	100	100	100	99	100	100	100	99	100	100	100	97	91	89	97	94	60	61	88	88	88	85	83	63	66	88	97	97	97	97	95	90	95	93
Dvir_008	72	80	66	29	100	97	100	100	100	100	100	100	100	99	99	99	100	100	99	100	100	99	99	99	100	99	97	91	89	97	94	60	61	88	88	88	85	83	63	66	88	96	96	96	96	95	90	94	93
Dvir_009	72	80	66	29	100	97	100	100	100	100	100	100	100	100	100	100	100	100	99	100	100	100	99	100	100	100	97	92	89	97	94	61	61	88	88	88	85	83	64	66	88	97	97	97	97	95	90	95	93
Dvir_010	72	80	66	29	100	97	100	100	100	100	100	100	100	100	100	100	100	100	99	100	100	100	99	100	100	100	97	92	89	97	94	61	61	88	88	88	85	83	64	66	88	97	97	97	97	95	90	95	93
Dvir_011	72	80	66	29	100	97	100	100	100	100	100	100	100	100	100	100	100	100	99	100	100	100	99	100	100	100	97	92	89	97	94	61	61	88	88	88	85	83	64	66	88	97	97	97	97	95	90	95	93
Dvir_012	72	80	66	29	100	97	100	100	100	100	100	100	100	100	100	100	100	100	99	100	100	100	99	100	100	100	97	92	89	97	94	61	61	88	88	88	85	83	64	66	88	97	97	97	97	95	90	95	93
Dvir_013	72	80	66	29	100	97	100	100	100	100	100	100	100	99	100	99	100	100	99	100	100	99	99	100	100	100	97	91	89	97	94	60	61	88	88	88	85	83	63	66	88	96	96	96	96	95	90	94	93
Dvir_014	72	80	66	29	100	97	99	99	100	100	100	100	99	100	100	99	100	100	99	100	99	99	99	100	99	99	97	91	89	97	94	60	61	88	88	88	85	82	63	66	88	96	96	96	96	95	90	94	93
Dvir_015	72	80	66	29	100	97	100	99	100	100	100	100	100	100	100	100	100	100	99	100	100	100	99	100	100	100	97	91	89	97	94	61	61	88	88	88	85	83	64	66	88	97	97	97	97	95	90	95	93
Dvir_016	72	80	66	29	100	97	100	99	100	100	100	100	99	99	100	100	100	100	99	100	99	100	99	100	100	100	97	91	89	97	94	60	61	88	88	88	85	82	63	66	88	97	97	97	97	95	90	95	93
Dvir_017	72	80	66	29	100	97	100	100	100	100	100	100	100	100	100	100	100	100	99	100	100	100	99	100	100	100	97	92	89	97	94	60	61	88	88	88	85	83	64	66	88	97	97	97	97	95	90	95	93
Dvir_018	72	80	66	29	100	97	100	100	100	100	100	100	100	100	100	100	100	100	99	100	100	100	99	100	100	100	97	92	89	97	94	61	61	88	88	88	85	83	64	66	88	97	97	97	97	95	90	95	93
Dvir_019	72	80	65	29	99	96	99	99	99	99	99	99	99	99	99	99	99	99	100	99	99	99	98	99	99	99	96	91	89	97	94	61	62	88	88	88	84	82	64	66	87	96	96	96	96	94	90	94	93
Dvir_020	72	80	66	29	100	97	100	100	100	100	100	100	100	100	100	100	100	100	99	100	100	100	99	100	100	100	97	92	89	97	94	60	61	88	88	88	85	83	64	66	88	97	97	97	97	95	90	95	93
Dvir_021	72	80	66	29	100	97	100	100	100	100	100	100	100	99	100	99	100	100	99	100	100	100	99	100	100	100	97	91	89	97	94	60	61	88	88	88	85	83	63	66	88	96	96	96	96	95	90	94	93
Dvir_022	72	80	66	29	100	97	100	99	100	100	100	100	99	99	100	100	100	100	99	100	100	100	99	100	100	100	97	92	89	97	94	60	61	88	88	88	85	82	63	66	88	97	97	97	97	95	90	95	93
Dvir_023	72	79	65	30	99	96	99	99	99	99	99	99	99	99	99	99	99	99	98	99	99	99	100	99	99	99	96	91	89	97	93	60	61	87	87	87	84	82	63	65	87	96	96	96	96	94	89	94	93
Dvir_024	72	80	66	29	100	97	100	99	100	100	100	100	100	100	100	100	100	100	99	100	100	100	99	100	100	100	97	91	90	97	94	60	62	88	88	88	85	83	64	66	88	97	97	97	97	95	90	95	93
Dvir_025	72	80	66	29	100	97	100	100	100	100	100	100	100	99	100	100	100	100	99	100	100	100	99	100	100	100	97	91	89	97	94	60	61	88	88	88	85	83	63	66	88	97	97	97	97	95	90	95	93
Dvir_026	72	80	66	29	100	97	100	99	100	100	100	100	100	99	100	100	100	100	99	100	100	100	99	100	100	100	97	91	89	97	94	60	61	88	88	88	85	83	64	66	88	97	97	97	97	95	90	95	93
Dall_027	72	81	67	30	97	94	97	97	97	97	97	97	97	97	97	97	97	97	96	97	97	97	96	97	97	97	100	94	92	99	97	61	63	88	88	88	84	82	64	66	88	98	98	98	98	96	91	95	94
Dall_028	72	79	65	35	91	89	91	91	92	92	92	92	91	91	91	91	92	92	91	92	91	92	91	91	91	91	94	100	86	94	91	64	62	83	83	83	80	78	59	61	83	92	92	92	92	90	86	91	89
Dall_029	68	73	61	37	89	87	89	89	89	89	89	89	89	89	89	89	89	89	89	89	89	89	89	90	89	89	92	86	100	92	89	61	65	81	81	81	78	76	68	70	81	90	90	90	90	89	83	88	87
Dall_030	73	80	67	30	97	94	97	97	97	97	97	97	97	97	97	97	97	97	97	97	97	97	97	97	97	97	99	94	92	100	97	62	63	88	88	88	85	83	64	66	88	98	98	98	98	96	91	96	94
Dall_031	70	80	65	32	94	91	94	94	94	94	94	94	94	94	94	94	94	94	94	94	94	94	93	94	94	94	97	91	89	97	100	62	63	85	85	85	82	80	61	63	85	95	95	95	95	93	88	93	92
Dall_032	51	57	47	47	60	58	60	60	61	61	61	61	60	60	61	60	60	61	61	60	60	60	60	60	60	60	61	64	61	62	62	100	86	55	55	55	52	51	48	48	55	60	60	60	60	59	59	59	60
Dall_033	54	51	56	41	61	59	61	61	61	61	61	61	61	61	61	61	61	61	62	61	61	61	61	62	61	61	63	62	65	63	63	86	100	56	56	56	53	57	47	47	56	62	62	62	62	60	61	60	58
Dcit_034	79	74	61	30	88	86	88	88	88	88	88	88	88	88	88	88	88	88	88	88	88	88	87	88	88	88	88	83	81	88	85	55	56	100	100	100	96	94	72	75	100	88	88	88	88	86	82	86	85
Dcit_035	79	73	62	30	88	86	88	88	88	88	88	88	88	88	88	88	88	88	88	88	88	88	87	88	88	88	88	83	81	88	85	55	56	100	100	100	96	94	72	75	100	88	88	88	88	86	82	86	85
Dcit_036	79	74	61	30	88	86	88	88	88	88	88	88	88	88	88	88	88	88	88	88	88	88	87	88	88	88	88	83	81	88	85	55	56	100	100	100	96	94	72	75	100	88	88	88	88	86	82	86	85
Dcit_037	75	70	58	34	85	88	85	85	85	85	85	85	85	85	85	85	85	85	84	85	85	85	84	85	85	85	84	80	78	85	82	52	53	96	96	96	100	95	68	70	96	84	84	84	84	83	79	83	82
Dcit_038	74	69	62	35	83	85	83	83	83	83	83	83	83	82	83	82	83	83	82	83	83	82	82	83	83	83	82	78	76	83	80	51	57	94	94	94	95	100	66	69	94	82	82	82	82	81	77	80	80
Dcit_039	67	66	54	47	63	61	63	63	64	64	64	64	63	63	64	63	64	64	64	64	63	63	63	64	63	64	64	59	68	64	61	48	47	72	72	72	68	66	100	95	72	63	63	63	63	65	63	61	60
Dcit_040	72	61	56	51	66	63	66	66	66	66	66	66	66	66	66	66	66	66	66	66	66	66	65	66	66	66	66	61	70	66	63	48	47	75	75	75	70	69	95	100	75	65	65	65	65	67	65	64	62
Dcit_041	79	73	62	30	88	86	88	88	88	88	88	88	88	88	88	88	88	88	87	88	88	88	87	88	88	88	88	83	81	88	85	55	56	100	100	100	96	94	72	75	100	88	88	88	88	86	82	86	85
Dana_042	72	81	67	29	97	94	97	96	97	97	97	97	96	96	97	97	97	97	96	97	96	97	96	97	97	97	98	92	90	98	95	60	62	88	88	88	84	82	63	65	88	100	100	100	100	98	93	98	97
Dana_043	72	81	67	29	97	94	97	96	97	97	97	97	96	96	97	97	97	97	96	97	96	97	96	97	97	97	98	92	90	98	95	60	62	88	88	88	84	82	63	65	88	100	100	100	100	98	93	98	97
DrosMulti_044	72	81	67	29	97	94	97	96	97	97	97	97	96	96	97	97	97	97	96	97	96	97	96	97	97	97	98	92	90	98	95	60	62	88	88	88	84	82	63	65	88	100	100	100	100	98	93	98	97
Dana_045	72	81	67	29	97	94	97	96	97	97	97	97	96	96	97	97	97	97	96	97	96	97	96	97	97	97	98	92	90	98	95	60	62	88	88	88	84	82	63	65	88	100	100	100	100	98	93	98	97
Dana_046	73	82	68	31	95	92	95	95	95	95	95	95	95	95	95	95	95	95	94	95	95	95	94	95	95	95	96	90	89	96	93	59	60	86	86	86	83	81	65	67	86	98	98	98	98	100	91	96	95
Dana_047	74	75	62	31	90	87	90	90	90	90	90	90	90	90	90	90	90	90	90	90	90	90	89	90	90	90	91	86	83	91	88	59	61	82	82	82	79	77	63	65	82	93	93	93	93	91	100	91	90
Dana_048	70	79	65	31	95	92	95	94	95	95	95	95	94	94	95	95	95	95	94	95	94	95	94	95	95	95	95	91	88	96	93	59	60	86	86	86	83	80	61	64	86	98	98	98	98	96	91	100	95
Dana_049	71	81	66	32	93	92	93	93	93	93	93	93	93	93	93	93	93	93	93	93	93	93	93	93	93	93	94	89	87	94	92	60	58	85	85	85	82	80	60	62	85	97	97	97	97	95	90	95	100
Dana_050	72	81	67	29	97	94	97	96	97	97	97	97	96	96	97	97	97	97	96	97	96	97	96	97	97	97	98	92	90	98	95	60	62	88	88	88	84	82	63	65	88	100	100	100	100	98	93	98	97
Dana_051	70	78	66	32	94	91	94	94	94	94	94	94	94	94	94	94	94	94	93	94	94	94	93	94	94	94	95	90	87	95	92	60	61	85	85	85	82	80	66	68	85	97	97	97	97	95	91	95	94
DrosMulti_052	69	78	65	35	91	89	90	90	91	91	91	91	90	90	91	91	91	91	90	91	90	91	90	91	90	90	91	86	84	92	89	60	58	82	82	82	80	78	63	65	82	94	94	94	94	92	87	92	97
Dana_053	68	79	63	31	92	89	92	91	92	92	92	92	91	91	92	92	92	92	91	92	91	92	91	92	92	92	93	87	85	93	90	62	61	83	83	83	80	79	59	61	83	95	95	95	95	93	89	93	95
Dana_054	70	78	65	31	94	91	94	94	94	94	94	94	94	94	94	94	94	94	94	94	94	94	94	94	94	94	95	90	87	95	93	60	60	85	85	85	82	80	61	63	85	98	98	98	98	96	91	100	94
Dana_055	72	81	67	29	97	94	96	96	97	97	97	97	96	96	96	96	97	97	96	97	96	97	96	96	96	96	97	92	90	98	95	60	61	87	88	87	84	82	63	65	88	100	100	100	100	98	93	98	97
Dana_056	70	79	66	29	94	92	94	94	94	94	94	94	94	94	94	94	94	94	94	94	94	94	94	94	94	94	95	90	88	96	93	61	64	85	86	85	83	82	61	63	86	98	98	98	98	96	92	96	95
Dana_057	67	71	57	37	82	79	82	82	82	82	82	82	82	82	82	82	82	82	81	82	82	82	83	82	82	82	83	81	75	83	80	63	61	74	74	74	73	70	54	56	74	85	85	85	85	83	81	83	82
Dana_058	55	54	62	52	48	51	48	48	48	48	48	48	48	48	48	48	48	48	48	48	48	48	47	48	48	48	48	51	47	49	46	49	52	44	45	44	46	51	56	51	45	49	49	49	49	51	51	47	49
Dmau_059	79	73	61	29	88	85	88	87	88	88	88	88	87	87	88	88	88	88	87	88	87	88	87	88	88	88	87	83	81	88	85	55	56	97	97	97	93	91	70	73	97	87	87	87	87	86	82	85	84
Dmau_060	79	73	61	29	88	85	88	87	88	88	88	88	88	87	88	88	88	88	87	88	88	88	87	88	88	88	87	83	81	88	85	55	56	97	97	97	93	91	70	72	97	87	87	87	87	85	82	85	84
Dmau_061	79	73	61	29	88	85	88	87	88	88	88	88	88	87	88	88	88	88	87	88	88	88	87	88	88	88	87	82	81	88	85	55	56	97	97	97	93	91	70	72	97	87	87	87	87	85	82	85	84
Dmau_062	76	73	64	32	85	83	85	85	85	85	85	85	85	85	85	85	85	85	85	85	85	85	85	85	85	85	85	80	78	85	82	53	54	94	94	94	90	88	70	73	94	85	85	85	85	83	79	83	82
DrosMulti_063	72	81	67	29	97	94	97	97	97	97	97	97	97	97	97	97	97	97	97	97	97	97	96	97	97	97	99	94	92	100	97	62	63	88	88	88	85	83	64	66	88	98	98	98	98	96	91	96	95
DrosMulti_064	72	81	67	29	97	94	97	97	97	97	97	97	97	97	97	97	97	97	97	97	97	97	96	97	97	97	99	94	92	100	97	62	63	88	88	88	85	83	64	66	88	98	98	98	98	96	91	96	95
DrosMulti_065	72	81	67	29	97	94	97	97	97	97	97	97	97	97	97	97	97	97	97	97	97	97	96	97	97	97	99	94	92	100	97	62	63	88	88	88	85	83	64	66	88	98	98	98	98	96	91	96	95
Dmel_066	72	81	67	29	97	94	97	97	97	97	97	97	97	97	97	97	97	97	97	97	97	97	96	97	97	97	99	94	92	100	97	62	63	88	88	88	85	83	64	66	88	98	98	98	98	96	91	96	95
Dmel_067	72	81	67	29	97	94	97	97	97	97	97	97	97	97	97	97	97	97	97	97	97	97	96	97	97	97	99	94	92	100	97	62	63	88	88	88	85	83	64	66	88	98	98	98	98	96	91	96	95
Dmel_068	72	81	67	29	97	94	97	97	97	97	97	97	97	97	97	97	97	97	97	97	97	97	96	97	97	97	99	94	92	100	97	62	63	88	88	88	85	83	64	66	88	98	98	98	98	96	91	96	95
Dmel_069	72	81	67	29	97	94	97	97	97	97	97	97	97	97	97	97	97	97	97	97	97	97	96	97	97	97	99	94	92	100	97	62	63	88	88	88	85	83	64	66	88	98	98	98	98	96	91	96	95
Dmel_070	72	81	67	29	97	94	97	97	97	97	97	97	97	97	97	97	97	97	97	97	97	97	96	97	97	97	99	94	92	100	97	62	63	88	88	88	85	83	64	66	88	98	98	98	98	96	91	96	94
Dmel_071	72	81	67	29	97	94	97	97	97	97	97	97	97	97	97	97	97	97	97	97	97	97	96	97	97	97	99	94	92	100	97	62	63	88	88	88	85	83	64	66	88	98	98	98	98	96	91	96	95
Dmel_072	72	81	67	29	97	94	97	97	97	97	97	97	97	97	97	97	97	97	97	97	97	97	96	97	97	97	99	94	92	100	97	62	63	88	88	88	85	83	64	66	88	98	98	98	98	96	91	96	94
Dmel_073	72	81	67	29	97	94	97	97	97	97	97	97	97	97	97	97	97	97	97	97	97	97	96	97	97	97	99	94	92	100	97	62	63	88	88	88	85	83	64	66	88	98	98	98	98	96	91	96	94
Dmel_074	72	81	67	29	97	94	97	97	97	97	97	97	97	97	97	97	97	97	97	97	97	97	96	97	97	97	99	94	92	100	97	62	63	88	88	88	85	83	64	66	88	98	98	98	98	96	91	96	95
DrosMulti_075	72	81	67	29	97	94	97	97	97	97	97	97	97	97	97	97	97	97	97	97	97	97	96	97	97	97	99	94	92	100	97	62	63	88	88	88	85	83	64	66	88	98	98	98	98	96	91	96	95
Dmel_076	72	81	67	29	97	94	97	97	97	97	97	97	97	97	97	97	97	97	97	97	97	97	96	97	97	97	99	94	92	100	97	62	63	88	88	88	85	83	64	66	88	98	98	98	98	96	91	96	95
Dmel_077	72	81	67	29	97	94	97	97	97	97	97	97	97	97	97	97	97	97	97	97	97	97	96	97	97	97	99	94	92	100	97	62	63	88	88	88	85	83	64	66	88	98	98	98	98	96	91	96	95
Dmel_078	72	81	67	29	97	94	97	97	97	97	97	97	97	97	97	97	97	97	97	97	97	97	96	97	97	97	99	94	92	100	97	62	63	88	88	88	85	83	64	66	88	98	98	98	98	96	91	96	95
Dmel_079	72	81	67	29	97	94	97	97	97	97	97	97	97	97	97	97	97	97	97	97	97	97	96	97	97	97	99	94	92	100	97	62	63	88	88	88	85	83	64	66	88	98	98	98	98	96	91	96	95
Dmel_080	70	83	65	27	95	92	95	95	95	95	95	95	95	95	95	95	95	95	94	95	95	95	94	95	95	95	97	92	90	98	95	64	65	86	86	86	83	81	66	64	86	96	96	96	96	94	89	94	92
Dmel_081	73	80	67	30	97	94	97	97	97	97	97	97	97	97	97	97	97	97	96	97	97	97	96	97	97	97	99	94	92	99	97	61	63	88	88	88	84	82	63	66	88	98	98	98	98	96	91	96	94
Dmel_082	72	81	67	29	97	94	97	97	97	97	97	97	97	97	97	97	97	97	97	97	97	97	96	97	97	97	99	94	92	100	97	62	63	88	88	88	85	83	64	66	88	98	98	98	98	96	91	96	95
Dmel_083	72	81	67	29	97	94	97	97	97	97	97	97	97	97	97	97	97	97	97	97	97	97	96	97	97	97	99	94	92	100	97	62	63	88	88	88	85	83	64	66	88	98	98	98	98	96	91	96	95
Dmel_084	72	81	67	29	97	94	97	97	97	97	97	97	97	97	97	97	97	97	97	97	97	97	96	97	97	97	99	94	92	100	97	62	63	88	88	88	85	83	64	66	88	98	98	98	98	96	91	96	95
Dmel_085	72	81	67	29	97	94	97	97	97	97	97	97	97	97	97	97	97	97	97	97	97	97	96	97	97	97	99	94	92	100	97	62	63	88	88	88	85	83	64	66	88	98	98	98	98	96	91	96	95
Dmel_086	72	81	67	29	97	94	97	97	97	97	97	97	97	97	97	97	97	97	97	97	97	97	96	97	97	97	99	94	92	100	97	62	63	88	88	88	85	83	64	66	88	98	98	98	98	96	91	96	95
Dmel_087	72	81	67	29	97	94	97	97	97	97	97	97	97	97	97	97	97	97	97	97	97	97	96	97	97	97	99	94	92	100	97	62	63	88	88	88	85	83	64	66	88	98	98	98	98	96	91	96	95
Dmel_088	72	81	67	29	97	94	97	97	97	97	97	97	97	97	97	97	97	97	97	97	97	97	96	97	97	97	99	94	92	100	97	62	63	88	88	88	85	83	64	66	88	98	98	98	98	96	91	96	95
Dmel_089	72	81	67	29	97	94	97	97	97	97	97	97	97	97	97	97	97	97	97	97	97	97	96	97	97	97	99	94	92	100	97	62	63	88	88	88	85	83	64	66	88	98	98	98	98	96	91	96	95
Dmel_090	72	81	67	29	97	94	97	97	97	97	97	97	97	97	97	97	97	97	96	97	97	97	96	97	97	97	99	94	92	99	97	61	63	88	88	88	84	82	63	66	88	98	98	98	98	96	92	96	95
Dmel_091	73	80	67	29	97	94	97	97	97	97	97	97	97	97	97	97	97	97	96	97	97	97	96	97	97	97	99	94	92	100	97	62	63	88	88	88	84	82	63	66	88	98	98	98	98	96	91	96	94
Dmel_092	72	81	67	29	97	94	97	97	97	97	97	97	97	97	97	97	97	97	97	97	97	97	96	97	97	97	99	94	92	100	97	62	63	88	88	88	85	83	64	66	88	98	98	98	98	96	91	96	94
DrosMulti_093	72	81	67	29	97	94	97	97	97	97	97	97	97	97	97	97	97	97	97	97	97	97	96	97	97	97	99	94	92	100	97	62	63	88	88	88	85	83	64	66	88	98	98	98	98	96	91	96	95
Dmel_094	72	81	67	29	97	94	97	97	97	97	97	97	97	97	97	97	97	97	97	97	97	97	96	97	97	97	99	94	92	100	97	62	63	88	88	88	85	83	64	66	88	98	98	98	98	96	91	96	94
Dmel_095	72	80	67	29	97	94	97	97	97	97	97	97	97	97	97	97	97	97	96	97	97	97	96	97	97	97	99	94	92	100	97	62	63	88	88	88	85	83	64	66	88	98	98	98	98	96	91	96	94
Dmel_096	74	80	66	31	95	93	95	95	96	96	96	96	95	95	95	95	96	96	95	95	95	95	95	95	95	95	98	93	90	98	95	63	64	87	87	87	83	81	63	65	87	96	96	96	96	95	90	94	93
Dmel_097	75	78	65	32	94	91	94	94	94	94	94	94	94	94	94	94	94	94	94	94	94	94	93	94	94	94	96	91	89	97	94	59	61	86	86	86	82	80	67	69	86	95	95	95	95	93	94	93	91
Dmel_098	72	81	67	29	97	94	97	97	97	97	97	97	97	97	97	97	97	97	97	97	97	97	96	97	97	97	99	94	92	100	97	62	63	88	88	88	85	83	64	66	88	98	98	98	98	96	91	96	95
Dmel_099	72	81	67	29	97	94	97	97	97	97	97	97	97	97	97	97	97	97	97	97	97	97	96	97	97	97	99	94	92	100	97	62	63	88	88	88	85	83	64	66	88	98	98	98	98	96	91	96	95
Dmel_100	72	80	67	29	97	94	97	97	97	97	97	97	97	97	97	97	97	97	96	97	97	97	96	97	97	97	99	94	92	100	97	62	63	88	88	88	85	82	63	66	88	98	98	98	98	96	91	96	94
Dmel_101	72	81	67	29	97	94	97	97	97	97	97	97	97	97	97	97	97	97	97	97	97	97	96	97	97	97	99	94	92	100	97	62	63	88	88	88	85	83	64	66	88	98	98	98	98	96	91	96	95
Dmel_102	72	80	67	30	97	94	97	97	97	97	97	97	97	97	97	97	97	97	96	97	97	97	96	97	97	97	99	94	92	100	97	62	63	88	88	88	85	82	63	66	88	98	98	98	98	96	91	96	94
Dmel_103	72	81	67	30	97	94	97	96	97	97	97	97	96	96	97	97	97	97	96	97	97	97	96	97	97	97	99	94	91	99	97	62	63	88	88	88	84	82	63	65	88	97	97	97	97	96	91	95	95
Dmel_104	72	81	67	29	97	94	97	97	97	97	97	97	97	97	97	97	97	97	97	97	97	97	96	97	97	97	99	94	92	100	97	62	63	88	88	88	85	83	64	66	88	98	98	98	98	96	91	96	95
Dmel_105	72	80	67	29	97	94	97	97	97	97	97	97	97	97	97	97	97	97	97	97	97	97	96	97	97	97	99	94	92	100	97	62	63	88	88	88	85	83	64	66	88	98	98	98	98	96	91	96	94
Dmel_106	72	81	67	29	97	94	97	97	97	97	97	97	97	97	97	97	97	97	97	97	97	97	96	97	97	97	99	94	92	100	97	62	63	88	88	88	85	83	64	66	88	98	98	98	98	96	91	96	95
Dmel_107	72	80	67	29	97	94	97	97	97	97	97	97	97	97	97	97	97	97	96	97	97	97	96	97	97	97	99	94	92	100	97	62	63	88	88	88	85	82	63	66	88	98	98	98	98	96	91	96	94
Dmel_108	72	81	67	29	97	94	97	97	97	97	97	97	97	97	97	97	97	97	97	97	97	97	96	97	97	97	99	94	92	100	97	62	63	88	88	88	85	83	64	66	88	98	98	98	98	96	91	96	95
Dmel_109	72	81	67	29	97	94	97	97	97	97	97	97	97	97	97	97	97	97	97	97	97	97	96	97	97	97	99	94	92	100	97	62	63	88	88	88	85	83	64	66	88	98	98	98	98	96	91	96	95
Dmel_110	73	80	66	30	97	94	96	96	97	97	97	97	96	96	97	97	97	97	96	97	96	97	96	97	96	96	99	94	91	99	96	62	63	87	88	87	84	82	64	66	88	97	97	97	97	95	92	95	94
Dmel_111	73	80	67	29	97	94	97	97	97	97	97	97	97	97	97	97	97	97	96	97	97	97	96	97	97	97	99	94	92	100	97	62	63	88	88	88	84	82	64	66	88	98	98	98	98	96	91	96	94
Dmel_112	68	75	68	30	92	94	92	92	92	92	92	92	92	91	92	92	92	92	91	92	92	92	91	92	92	92	94	88	86	94	91	62	64	83	83	83	85	84	59	61	83	92	92	92	92	90	86	90	90
Dmel_113	72	81	68	30	96	93	96	96	96	96	96	96	96	96	96	96	96	96	96	96	96	96	96	96	96	96	99	93	91	99	96	61	62	87	87	87	84	82	64	67	87	97	97	97	97	95	91	95	94
Dmel_114	72	81	67	29	97	94	97	97	97	97	97	97	97	97	97	97	97	97	97	97	97	97	96	97	97	97	99	94	92	100	97	62	63	88	88	88	85	83	64	66	88	98	98	98	98	96	91	96	94
Dmel_115	72	81	67	29	97	94	97	97	97	97	97	97	97	97	97	97	97	97	97	97	97	97	96	97	97	97	99	94	92	100	97	62	63	88	88	88	85	83	64	66	88	98	98	98	98	96	91	96	95
Dmel_116	70	78	64	32	94	92	94	94	95	95	95	95	94	94	94	94	95	95	94	94	94	94	94	94	94	94	97	92	89	97	94	64	66	86	86	86	82	80	61	64	86	95	95	95	95	93	89	93	92
Dmel_117	72	80	67	29	97	94	97	97	97	97	97	97	97	97	97	97	97	97	96	97	97	97	96	97	97	97	99	94	92	99	97	62	63	88	88	88	84	82	63	66	88	98	98	98	98	96	91	95	94
Dmel_118	74	82	68	31	96	93	96	95	96	96	96	96	96	95	96	96	96	96	95	96	96	96	95	96	96	96	98	93	90	98	95	60	62	87	87	87	83	81	65	67	87	96	96	96	96	97	90	94	93
Dmel_119	70	83	68	31	95	92	95	95	95	95	95	95	95	95	95	95	95	95	94	95	95	95	94	95	95	95	97	92	89	97	95	61	62	86	86	86	83	80	66	67	86	96	96	96	96	94	89	94	92
Dmel_120	72	81	67	29	97	94	97	97	97	97	97	97	97	97	97	97	97	97	97	97	97	97	96	97	97	97	99	94	92	100	97	62	63	88	88	88	85	83	64	66	88	98	98	98	98	96	91	96	95
Dmel_121	72	81	67	29	97	94	97	97	97	97	97	97	97	97	97	97	97	97	97	97	97	97	96	97	97	97	99	94	92	100	97	62	63	88	88	88	85	83	64	66	88	98	98	98	98	96	91	96	94
Dmel_122	72	80	66	30	96	93	96	96	96	96	96	96	96	96	96	96	96	96	96	96	96	96	97	96	96	96	99	93	91	99	96	61	62	87	87	87	84	82	63	65	87	97	97	97	97	95	90	95	94
Dmel_123	73	80	67	30	96	94	96	96	96	96	96	96	96	96	96	96	96	96	96	96	96	96	96	96	96	96	99	93	91	99	96	61	62	88	88	88	84	82	64	67	88	97	97	97	97	95	92	95	94
Dmel_124	73	80	67	30	96	93	96	96	96	96	96	96	96	96	96	96	96	96	96	96	96	96	95	96	96	96	99	93	91	99	96	61	62	87	87	87	84	82	65	67	87	97	97	97	97	95	92	95	94
Dmel_125	72	80	67	30	97	94	97	97	97	97	97	97	97	97	97	97	97	97	96	97	97	97	96	97	97	97	99	94	92	100	97	62	63	88	88	88	85	83	63	66	88	98	98	98	98	96	91	96	94
Dmel_126	72	79	67	31	95	92	95	95	95	95	95	95	95	95	95	95	95	95	95	95	95	95	95	95	95	95	98	93	91	98	95	60	61	86	87	86	83	81	64	66	87	96	96	96	96	94	89	94	93
Dmel_127	73	80	67	30	97	94	97	97	97	97	97	97	97	97	97	97	97	97	96	97	97	97	96	97	97	97	99	94	92	100	97	62	63	88	88	88	85	83	64	66	88	98	98	98	98	96	91	96	94
Dmel_128	70	82	65	28	94	91	94	94	94	94	94	94	94	94	94	94	94	94	94	94	94	94	93	94	94	94	97	91	89	97	94	63	66	85	85	85	82	81	65	63	85	95	95	95	95	93	88	93	92
Dmel_129	72	80	67	29	97	94	97	97	97	97	97	97	97	97	97	97	97	97	97	97	97	97	96	97	97	97	99	94	92	100	97	62	63	88	88	88	85	83	64	66	88	98	98	98	98	96	91	96	94
Dmel_130	72	80	67	29	97	94	97	97	97	97	97	97	97	97	97	97	97	97	97	97	97	97	96	97	97	97	99	94	92	100	97	62	63	88	88	88	85	83	64	66	88	98	98	98	98	96	91	96	94
Dmel_131	72	81	67	29	97	94	97	97	97	97	97	97	97	97	97	97	97	97	96	97	97	97	96	97	97	97	99	94	92	100	97	62	63	88	88	88	85	82	64	66	88	98	98	98	98	96	91	96	94
Dmel_132	70	77	64	33	94	91	94	94	94	94	94	94	94	94	94	94	94	94	93	94	94	94	93	94	94	94	96	91	89	97	94	61	62	85	85	85	82	80	65	67	85	95	95	95	95	93	88	93	91
Dmel_133	73	74	68	30	91	88	91	91	91	91	91	91	91	91	91	91	91	91	91	91	91	91	91	91	91	91	93	88	86	94	91	63	64	83	83	83	80	79	64	66	83	92	92	92	92	90	91	90	88
Dmel_134	72	81	67	29	97	94	97	97	97	97	97	97	97	97	97	97	97	97	97	97	97	97	96	97	97	97	99	94	92	100	97	62	63	88	88	88	85	83	64	66	88	98	98	98	98	96	91	96	95
Dmel_135	70	78	64	32	94	92	94	94	95	95	95	95	94	94	94	94	95	95	94	94	94	94	94	94	94	94	97	92	89	97	94	64	66	86	86	86	82	80	61	64	86	95	95	95	95	93	89	93	92
Dmel_136	73	78	67	32	95	92	95	94	95	95	95	95	95	94	95	95	95	95	94	95	95	95	94	95	95	95	97	92	89	97	95	62	63	86	86	86	83	81	62	64	86	95	95	95	95	94	89	93	92
Dmel_137	70	77	67	33	94	91	94	94	94	94	94	94	94	94	94	94	94	94	93	94	94	94	93	94	94	94	96	91	89	97	94	59	60	85	85	85	82	80	61	63	85	95	95	95	95	93	88	93	91
Dmel_138	73	80	67	30	97	94	97	97	97	97	97	97	97	97	97	97	97	97	96	97	97	97	96	97	97	97	99	94	92	100	97	62	63	88	88	88	85	82	64	66	88	98	98	98	98	96	91	96	94
Dmel_139	72	81	67	29	97	94	96	96	97	97	97	97	96	96	97	96	97	97	96	97	96	97	96	97	96	96	99	94	91	99	96	62	63	87	88	87	84	82	64	65	88	97	97	97	97	95	91	95	94
Dmel_140	70	78	64	28	94	91	94	94	94	94	94	94	94	94	94	94	94	94	93	94	94	94	93	94	94	94	97	91	90	97	94	59	60	85	85	85	82	80	62	64	85	95	95	95	95	93	88	93	91
Dmel_141	72	79	66	35	91	89	91	91	91	91	91	91	91	91	91	91	91	91	91	91	91	91	91	91	91	91	94	88	87	94	94	63	60	83	83	83	80	77	65	69	83	92	92	92	92	92	86	90	89
Dmel_142	71	79	65	31	96	93	96	95	96	96	96	96	95	95	96	96	96	96	95	96	96	96	95	96	96	96	98	93	93	98	96	63	64	87	87	87	83	81	62	65	87	96	96	96	96	95	90	94	93
Dmel_143	72	81	67	29	97	94	97	97	97	97	97	97	97	97	97	97	97	97	96	97	97	97	96	97	97	97	99	94	92	100	97	62	63	88	88	88	85	82	63	66	88	98	98	98	98	96	91	96	95
Dmel_144	71	85	72	34	92	90	92	92	92	92	92	92	92	92	92	92	92	92	92	92	92	92	92	92	92	92	95	89	87	95	92	57	58	84	84	84	80	78	69	71	84	93	93	93	93	94	87	91	90
Dmel_145	71	79	65	28	96	93	95	95	96	96	96	96	95	95	96	96	96	96	95	96	95	96	95	96	95	96	98	93	90	98	95	63	65	87	87	87	83	81	62	64	87	96	96	96	96	94	90	94	93
Dmel_146	72	80	67	29	97	94	97	97	97	97	97	97	97	97	97	97	97	97	96	97	97	97	96	97	97	97	99	94	92	100	97	62	63	88	88	88	85	82	63	66	88	98	98	98	98	96	91	96	94
Dmel_147	74	82	68	31	95	92	95	95	95	95	95	95	95	95	95	95	95	95	95	95	95	95	95	95	95	95	98	92	90	98	95	60	61	86	86	86	83	81	65	67	86	96	96	96	96	97	89	94	93
Dmel_148	69	81	66	30	93	90	93	93	93	93	93	93	93	93	93	93	93	93	93	93	93	93	92	93	93	93	95	90	88	96	93	63	64	84	84	84	81	79	63	66	84	94	94	94	94	92	91	92	90
Dmel_149	73	83	69	37	90	87	90	90	90	90	90	90	90	90	90	90	90	90	90	90	90	90	89	90	90	90	92	91	84	92	90	59	61	82	82	82	78	76	67	69	82	91	91	91	91	92	84	89	87
Dmel_150	71	78	65	32	95	92	94	94	95	95	95	95	94	94	94	95	95	95	94	95	94	95	94	94	94	94	97	91	89	97	94	63	60	86	86	86	82	80	65	67	86	95	95	95	95	93	89	93	92
Dmel_151	67	75	64	35	91	89	91	91	91	91	91	91	91	91	91	91	91	91	91	91	91	91	91	91	91	91	94	88	92	94	91	56	57	83	83	83	80	77	63	66	83	92	92	92	92	90	86	90	89
Dmel_152	71	79	66	30	96	93	96	96	96	96	96	96	96	96	96	96	96	96	95	96	96	96	95	96	96	96	98	93	91	99	96	61	62	87	87	87	84	82	63	65	87	96	96	96	96	95	90	94	93
Dmel_153	73	80	66	30	96	93	96	96	96	96	96	96	96	96	96	96	96	96	96	96	96	96	95	96	96	96	99	93	91	99	96	61	62	87	87	87	84	82	63	65	87	97	97	97	97	95	92	95	94
Dmel_154	67	75	65	30	90	88	90	90	91	90	91	91	90	90	90	90	90	90	90	90	90	90	90	90	90	90	93	88	85	93	93	67	68	82	82	82	79	77	59	62	82	91	91	91	91	89	89	90	88
Dmel_155	71	79	67	31	92	90	92	92	93	93	93	93	92	92	92	92	93	93	92	92	92	92	92	92	92	92	95	89	87	95	92	63	60	84	84	84	81	79	66	67	84	93	93	93	93	91	87	91	90
Dmel_156	72	79	67	31	96	93	96	96	96	96	96	96	96	96	96	96	96	96	96	96	96	96	95	96	96	96	98	93	91	99	96	62	62	87	87	87	84	82	64	67	87	97	97	97	97	95	90	95	93
Dmel_157	71	79	69	31	91	89	91	91	91	91	91	91	91	91	91	91	91	91	91	91	91	91	90	91	91	91	93	88	86	94	91	60	61	83	83	83	80	78	63	62	83	92	92	92	92	90	86	90	91
Dmel_158	61	82	59	35	79	82	79	79	79	79	79	79	79	79	79	79	79	79	79	79	79	79	78	79	79	79	81	76	79	81	79	60	62	72	72	72	73	71	66	64	72	80	80	80	80	82	78	78	81
Dmel_159	70	80	66	32	94	92	94	94	95	95	95	95	94	94	94	94	95	95	94	94	94	94	94	94	94	94	97	91	92	97	94	62	64	86	86	86	82	80	63	65	86	95	95	95	95	93	89	93	92
Dmel_160	62	67	63	39	83	85	83	83	83	83	83	83	83	83	83	83	83	83	82	83	83	83	82	83	83	83	85	79	84	85	82	56	59	75	76	75	77	76	58	60	76	83	83	83	83	81	77	85	81
Dmel_161	72	80	67	30	97	94	97	97	97	97	97	97	97	97	97	97	97	97	96	97	97	97	96	97	97	97	99	94	92	100	97	62	63	88	88	88	84	82	64	66	88	98	98	98	98	96	91	96	94
Dmel_162	70	81	70	28	94	91	94	94	94	94	94	94	94	94	94	94	94	94	94	94	94	94	93	94	94	94	96	91	89	97	94	62	63	85	86	85	82	80	65	65	86	95	95	95	95	93	88	93	92
Dmel_163	67	75	69	26	91	88	91	91	91	91	91	91	91	91	91	91	91	91	90	91	91	91	90	91	91	91	93	87	85	93	90	66	67	82	82	82	79	78	58	60	82	91	91	91	91	89	89	89	88
Dmel_164	70	74	64	33	90	88	90	90	91	90	90	91	90	90	90	90	90	90	90	90	90	90	90	91	90	90	93	87	85	93	90	62	59	82	82	82	79	76	68	70	82	91	91	91	91	89	85	89	88
Dmel_165	72	74	63	33	90	87	90	90	90	90	90	90	90	90	90	90	90	90	89	90	90	90	89	90	90	90	92	87	84	92	90	57	58	81	82	81	81	76	62	64	82	91	91	91	91	89	84	89	87
Dmel_166	70	75	64	35	91	89	91	91	91	91	91	91	91	91	91	91	91	91	91	91	91	91	90	91	91	91	93	88	89	94	91	61	62	83	83	83	80	78	62	65	83	92	92	92	92	90	85	90	89
Dmel_167	72	80	68	30	96	93	96	96	96	96	96	96	96	96	96	96	96	96	96	96	96	96	95	96	96	96	98	93	91	99	96	61	62	87	87	87	84	82	63	65	87	97	97	97	97	95	90	95	93
Dmel_168	64	78	70	37	85	82	84	84	85	85	85	85	84	84	85	84	85	85	84	85	84	85	84	84	84	84	87	81	82	87	84	54	61	77	77	77	74	77	62	64	77	85	85	85	85	87	80	83	82
Dmel_169	67	75	63	35	91	88	91	91	91	91	91	91	91	91	91	91	91	91	90	91	91	91	90	91	91	91	93	88	85	93	90	60	57	83	83	83	79	77	63	66	83	91	91	91	91	89	85	89	88
Dmel_170	52	66	52	39	74	71	74	74	74	74	74	74	74	74	74	74	74	74	74	74	74	74	73	74	74	74	76	70	74	76	73	63	64	67	67	67	64	62	63	58	67	75	75	75	75	73	68	76	71
Dmel_171	63	67	62	40	82	79	82	82	82	82	82	82	82	82	82	82	82	82	81	82	82	82	81	82	82	82	85	78	81	84	81	59	61	75	75	75	72	75	58	60	75	83	83	83	83	81	80	80	79
Dmel_172	58	66	60	38	78	75	78	78	78	78	78	78	77	77	78	78	78	78	77	78	77	78	77	78	78	78	79	78	72	80	77	60	54	71	71	71	70	66	56	58	71	78	78	78	78	76	72	76	77
Dmel_173	75	72	59	38	88	86	88	88	89	88	89	89	88	88	88	88	88	89	88	88	88	88	89	88	88	88	91	90	84	91	91	63	64	80	80	80	77	75	62	64	80	89	89	89	89	88	89	88	86
Dmel_174	72	72	64	37	88	85	88	88	88	88	88	88	88	88	88	88	88	88	88	88	88	88	89	88	88	88	90	85	85	91	91	61	64	80	81	80	77	75	65	68	81	89	89	89	89	87	88	88	85
Dmel_175	77	72	61	38	88	86	88	88	88	88	88	88	88	88	88	88	88	88	88	88	88	88	88	89	88	88	90	90	85	91	91	63	66	80	80	80	77	75	64	66	80	89	89	89	89	87	88	88	85
Dmel_176	73	74	63	36	91	88	91	91	91	91	91	91	91	91	91	91	91	91	90	91	91	91	90	91	91	91	93	88	86	93	93	61	63	82	83	82	79	79	64	66	83	91	91	91	91	90	91	90	88
Dmel_177	74	73	63	37	90	87	90	89	90	90	90	90	90	90	90	90	90	90	89	90	90	90	91	90	90	90	92	87	87	92	93	59	62	82	82	82	78	76	65	67	82	90	90	90	90	89	90	89	87
Dmel_178	74	74	64	36	90	88	90	90	91	90	91	91	90	90	90	90	90	90	90	90	90	90	90	91	90	90	93	87	88	93	93	61	64	82	82	82	79	77	66	68	82	91	91	91	91	89	90	90	88
Dmel_179	73	73	62	37	89	87	89	89	90	90	90	90	89	89	89	89	90	90	89	90	89	89	90	90	89	89	92	87	87	92	92	59	63	82	82	81	78	76	65	67	82	90	90	90	90	89	90	89	87
Dmel_180	74	73	63	36	90	87	90	90	90	90	90	90	90	90	90	90	90	90	89	90	90	90	91	90	90	90	92	87	87	92	93	59	62	82	82	82	79	76	65	67	82	90	90	90	90	89	90	89	87
Dmel_181	74	74	63	36	90	88	90	90	90	90	90	90	90	90	90	90	90	90	90	90	90	90	90	91	90	90	93	88	88	93	93	61	64	82	82	82	79	77	66	68	82	91	91	91	91	90	91	90	88
Dmel_182	53	57	64	41	74	71	74	73	74	74	74	74	73	73	74	74	74	74	74	74	73	74	75	74	74	74	75	73	69	76	76	60	58	67	67	67	66	64	48	50	67	74	74	74	74	72	68	72	71
Dmel_183	75	72	59	38	88	86	88	88	89	88	89	89	88	88	88	88	88	89	88	88	88	88	89	88	88	88	91	90	84	91	91	63	64	80	80	80	77	75	62	64	80	89	89	89	89	88	89	88	86
Dmel_184	65	67	56	39	81	83	81	81	81	81	81	81	81	81	81	81	81	81	80	81	81	81	80	81	81	81	83	78	80	83	80	57	58	73	73	73	75	74	54	56	73	82	82	82	82	80	76	80	80
Dmel_185	74	69	62	40	86	83	86	86	86	86	86	86	86	86	86	86	86	86	85	86	86	86	87	86	86	86	88	87	83	88	88	63	66	78	78	78	75	73	63	65	78	86	86	86	86	85	86	85	83
Dmel_186	75	69	64	39	86	83	86	86	86	86	86	86	86	86	86	86	86	86	85	86	86	86	85	86	86	86	88	87	83	88	89	63	68	78	78	78	75	75	63	66	78	86	86	86	86	85	86	85	83
Dmel_187	69	75	62	32	90	87	90	90	90	90	90	90	90	90	90	90	90	90	90	90	90	90	89	90	90	90	92	87	88	93	90	67	68	82	82	82	79	77	58	60	82	91	91	91	91	89	89	89	88
Dmel_188	56	55	58	50	68	66	68	68	69	69	69	69	68	69	68	68	69	69	69	68	68	69	68	69	68	68	71	65	77	70	67	64	60	63	63	63	62	59	63	65	63	69	69	69	69	68	70	67	67
Dmel_189	72	78	65	34	88	86	88	88	88	88	88	88	88	88	88	88	88	88	88	88	88	88	87	88	88	88	90	85	83	91	88	57	54	80	80	80	76	74	61	63	80	89	89	89	89	87	85	87	92
Dmel_190	66	72	64	34	87	84	87	87	87	87	87	87	87	87	87	87	87	87	87	87	87	87	86	87	87	87	89	84	85	90	86	72	69	79	79	79	76	75	62	66	79	88	88	88	88	86	85	85	84
Dmel_191	59	63	61	38	74	71	74	74	74	74	74	74	74	74	74	74	74	74	74	74	74	74	73	74	74	74	77	70	77	76	76	63	66	68	68	68	65	64	53	55	68	75	75	75	75	75	72	73	71
Dmel_192	72	81	67	29	97	94	97	97	97	97	97	97	97	97	97	97	97	97	97	97	97	97	96	97	97	97	99	94	92	100	97	62	63	88	88	88	85	83	64	66	88	98	98	98	98	96	91	96	95
Dmel_193	72	81	67	29	97	94	97	97	97	97	97	97	97	97	97	97	97	97	97	97	97	97	96	97	97	97	99	94	92	100	97	62	63	88	88	88	85	83	64	66	88	98	98	98	98	96	91	96	94
Dmel_194	72	81	67	29	97	94	97	97	97	97	97	97	97	97	97	97	97	97	97	97	97	97	96	97	97	97	99	94	92	100	97	62	63	88	88	88	85	83	64	66	88	98	98	98	98	96	91	96	95
Dmel_195	71	80	68	28	96	93	96	96	96	96	96	96	96	96	96	96	96	96	96	96	96	96	95	96	96	96	98	93	91	99	96	63	64	87	87	87	84	82	63	65	87	97	97	97	97	95	90	95	93
Dmel_196	48	58	66	55	60	63	61	61	60	60	60	60	61	60	60	60	60	60	60	60	61	60	60	60	61	60	62	63	55	62	59	58	53	55	55	55	59	62	47	50	55	61	61	61	61	62	55	62	58
Dmel_197	63	70	63	49	73	76	73	73	73	73	73	73	73	72	73	73	73	73	72	73	73	73	74	73	73	73	74	77	67	75	72	56	54	66	66	66	68	67	55	60	66	74	74	74	74	75	68	75	74
Dmel_198	57	54	50	48	63	66	63	63	63	63	63	63	63	63	63	63	63	63	63	63	63	63	64	63	63	63	65	64	67	65	62	57	67	57	58	57	59	62	47	51	57	64	64	64	64	64	65	66	62
Dmel_199	49	71	51	48	66	68	66	66	66	66	66	66	66	65	66	66	66	66	65	66	66	66	67	66	66	66	67	65	63	67	65	58	47	60	60	60	64	60	59	59	60	67	67	67	67	68	60	68	67
Dmel_200	50	63	58	43	67	69	67	67	67	67	67	67	67	67	67	67	67	67	66	67	67	67	66	67	67	67	68	66	62	69	69	58	56	61	61	61	65	62	46	44	61	68	68	68	68	66	61	69	69
Dmel_201	49	60	59	52	64	62	65	65	65	64	65	65	65	65	65	64	65	65	64	64	65	64	64	64	65	64	67	68	65	67	70	53	52	59	59	59	56	60	47	51	59	65	65	65	65	63	61	63	65
Dmel_202	60	56	49	52	60	63	61	61	61	60	61	61	61	60	61	60	60	60	60	60	61	60	60	60	61	60	62	61	58	62	63	50	47	55	55	55	59	55	55	51	55	61	61	61	61	59	63	63	62
Dmel_203	59	64	64	45	68	66	69	68	69	69	69	69	69	69	68	69	69	69	69	68	69	69	68	69	69	68	70	71	69	70	70	67	62	63	63	63	60	59	53	52	63	69	69	69	69	67	65	70	65
Dmel_204	50	59	52	46	67	65	67	67	67	67	67	67	67	67	67	67	67	67	67	67	67	67	66	67	67	67	70	63	68	69	69	62	62	61	61	61	58	56	63	63	61	68	68	68	68	67	66	70	67
Dmel_205	45	58	48	63	52	55	53	53	53	52	53	53	53	53	53	52	52	53	53	52	53	52	53	52	53	52	53	59	52	54	51	63	52	48	48	48	52	49	51	48	48	53	53	53	53	54	46	54	56
Dmel_206	53	53	46	48	55	58	56	56	55	55	55	55	56	56	55	55	55	55	56	55	56	55	56	56	56	55	57	56	54	57	60	64	65	51	51	51	53	50	46	43	51	56	56	56	56	55	56	58	56
Dmel_207	48	58	55	51	62	65	63	63	63	63	63	63	63	63	63	62	63	63	62	62	63	62	63	63	63	62	65	66	63	64	61	49	48	57	58	57	62	58	46	46	58	63	63	63	63	61	59	61	67
Dmel_208	49	39	45	58	49	52	49	49	49	49	49	49	49	49	49	49	49	49	49	49	49	49	48	49	49	49	51	52	57	50	50	64	58	45	46	45	50	46	49	49	46	49	49	49	49	48	51	47	47
Dmel_209	55	62	63	52	58	61	59	58	58	58	58	58	59	59	58	58	58	58	58	58	59	58	59	59	59	58	60	66	55	60	60	56	55	53	53	53	55	55	49	52	53	59	59	59	59	60	54	57	62
Dmel_210	57	52	57	67	54	52	54	54	54	54	54	54	54	55	54	54	54	54	55	54	54	54	54	55	54	54	55	53	59	56	53	46	38	50	50	50	50	45	59	62	50	54	54	54	54	56	54	56	57
Dmel_211	47	56	52	40	60	63	60	60	60	60	60	60	60	60	60	60	60	60	60	60	60	60	60	60	60	60	62	56	65	62	59	67	65	55	55	55	59	55	49	49	55	61	61	61	61	59	59	63	62
Dmel_212	58	70	66	44	66	63	66	66	66	66	66	66	66	66	66	66	66	66	65	66	66	66	67	66	66	66	67	73	64	68	68	56	56	60	60	60	57	55	51	52	60	66	66	66	66	68	60	68	66
Dmel_213	54	53	54	42	61	64	61	61	61	61	61	61	61	61	61	61	61	61	61	61	61	61	62	61	61	61	62	65	57	62	60	54	54	56	56	56	58	57	39	41	56	61	61	61	61	59	61	63	65
Dmel_214	41	50	46	52	54	57	55	55	54	54	54	54	55	54	54	54	54	54	55	54	55	54	54	55	55	54	56	53	58	56	56	57	53	50	50	50	54	50	51	53	50	55	55	55	55	53	53	56	56
Dmel_215	62	63	62	40	69	67	68	68	69	69	69	69	68	68	69	69	69	69	68	69	68	69	68	69	68	69	70	69	64	71	67	54	59	62	62	62	60	58	60	64	62	69	69	69	69	71	65	67	67
DrosMulti_216	72	81	67	29	97	94	97	97	97	97	97	97	97	97	97	97	97	97	97	97	97	97	96	97	97	97	100	94	92	100	97	62	63	88	88	88	85	83	64	66	88	98	98	98	98	96	91	96	95
Dsim_217	72	81	67	29	97	94	97	97	97	97	97	97	97	97	97	97	97	97	97	97	97	97	96	97	97	97	100	94	92	100	97	62	63	88	88	88	85	83	64	66	88	98	98	98	98	96	91	96	95
Dsim_218	70	78	70	32	94	91	94	94	94	94	94	94	94	94	94	94	94	94	93	94	94	94	93	94	94	94	95	90	87	95	92	58	64	85	85	85	82	85	61	63	85	97	97	97	97	95	91	95	94
Dsim_219	72	81	67	29	97	94	97	96	97	97	97	97	96	96	97	97	97	97	96	97	96	97	96	97	97	97	98	92	90	98	95	60	62	88	88	88	84	82	63	65	88	100	100	100	100	98	93	98	97
DrosMulti_220	72	81	67	29	97	94	97	97	97	97	97	97	97	97	97	97	97	97	96	97	97	97	96	97	97	97	98	93	90	98	95	61	62	88	88	88	85	82	63	66	88	100	100	100	100	98	93	98	96
Dsim_221	66	75	61	23	91	88	91	91	91	91	91	91	91	91	91	91	91	91	90	91	91	91	90	91	91	91	92	86	84	92	89	55	56	82	82	82	79	77	57	60	82	94	94	94	94	92	88	92	91
Dsim_222	72	81	67	29	97	94	97	96	97	97	97	97	96	96	97	97	97	97	96	97	96	97	96	97	97	97	98	92	90	98	95	60	62	88	88	88	84	82	63	65	88	100	100	100	100	98	93	98	97
DrosMulti_223	72	81	67	29	97	94	97	96	97	97	97	97	96	96	97	97	97	97	96	97	96	97	96	97	97	97	98	92	90	98	95	60	62	88	88	88	84	82	63	65	88	100	100	100	100	98	93	98	97
Dsim_224	72	81	67	29	97	94	97	96	97	97	97	97	96	96	97	97	97	97	96	97	96	97	96	97	97	97	98	92	90	98	95	60	62	88	88	88	84	82	63	65	88	100	100	100	100	98	93	98	97
Dsim_225	72	80	68	29	96	93	96	96	96	96	96	96	96	96	96	96	96	96	96	96	96	96	95	96	96	96	97	92	89	97	95	60	62	87	87	87	84	83	63	65	87	100	100	100	100	98	93	97	96
Dsim_226	73	82	68	30	96	93	95	95	96	96	96	96	95	95	96	95	96	96	95	96	95	96	95	96	95	95	96	91	89	97	94	59	60	87	87	87	83	81	64	67	87	99	99	99	99	99	92	97	96
Dsim_227	72	81	67	29	97	94	97	96	97	97	97	97	96	96	97	97	97	97	96	97	96	97	96	97	97	97	98	92	90	98	95	60	62	88	88	88	84	82	63	65	88	100	100	100	100	98	93	98	97
Dsim_228	71	79	69	29	95	92	95	95	95	95	95	95	95	95	95	95	95	95	94	95	95	95	94	95	95	95	96	90	88	96	93	62	64	86	86	86	83	81	63	66	86	98	98	98	98	96	91	96	95
Dsim_229	72	80	67	29	96	94	96	96	96	96	96	96	96	96	96	96	96	96	96	96	96	96	96	96	96	96	97	92	90	98	95	61	62	87	87	87	84	82	63	65	87	100	100	100	100	98	93	98	96
Dsim_230	72	81	67	29	97	94	97	96	97	97	97	97	96	96	97	97	97	97	96	97	96	97	96	97	97	97	98	92	90	98	95	60	62	88	88	88	84	82	63	65	88	100	100	100	100	98	93	98	97
Dsim_231	72	81	67	29	97	94	97	96	97	97	97	97	96	96	97	97	97	97	96	97	96	97	96	97	97	97	98	92	90	98	95	60	62	88	88	88	84	82	63	65	88	100	100	100	100	98	93	98	97
Dsim_232	73	80	66	30	96	93	96	96	96	96	96	96	96	96	96	96	96	96	95	96	96	96	95	96	96	96	97	92	89	97	94	61	62	87	87	87	84	81	62	65	87	99	99	99	99	97	93	97	96
Dsim_233	72	80	67	29	96	94	96	96	97	96	96	97	96	97	96	96	96	96	96	96	96	96	96	96	96	96	97	92	90	98	95	60	61	87	87	87	84	82	63	65	87	100	100	100	100	98	93	98	96
Dsim_234	70	80	65	27	95	92	94	94	95	95	95	95	94	94	95	94	95	95	94	95	94	95	94	95	94	94	95	90	88	96	93	63	64	86	86	86	83	80	61	64	86	98	98	98	98	96	96	96	94
Dsim_235	72	80	67	28	96	93	96	96	96	96	96	96	96	96	96	96	96	96	96	96	96	96	95	96	96	96	97	92	89	97	95	61	62	87	87	87	84	82	63	65	87	100	100	100	100	98	94	97	96
Dsim_236	71	79	68	30	95	92	95	95	95	95	95	95	95	95	95	95	95	95	95	95	95	95	94	95	95	95	96	91	88	96	94	59	60	86	87	86	83	81	62	64	87	99	99	99	99	97	92	96	95
Dsim_237	70	78	64	32	94	92	94	94	94	94	94	94	94	94	94	94	94	94	94	94	94	94	94	94	94	94	97	91	94	97	94	59	61	85	85	85	82	80	66	68	85	95	95	95	95	93	89	93	92
Dsim_238	71	80	68	28	96	93	96	96	96	96	96	96	96	96	96	96	96	96	95	96	96	96	95	96	96	96	97	92	89	97	94	61	62	87	87	87	84	82	63	65	87	99	99	99	99	97	93	97	96
Dsim_239	72	81	67	29	96	94	96	96	97	96	97	97	96	96	96	96	97	97	96	96	96	96	96	96	96	96	97	92	90	98	95	61	62	87	88	87	84	82	63	65	88	100	100	100	100	98	93	98	96
Dsim_240	72	80	68	29	96	94	96	96	96	96	96	96	96	96	96	96	96	96	96	96	96	96	96	96	96	96	97	92	90	98	94	61	62	87	87	87	84	83	63	65	87	99	99	99	99	98	93	97	96
Dsim_241	72	80	67	29	96	94	96	96	97	96	97	97	96	96	96	96	96	96	96	96	96	96	96	96	96	96	97	92	90	98	95	61	61	87	87	87	84	82	63	66	87	100	100	100	100	98	93	98	96
Dsim_242	69	77	66	32	92	90	92	92	92	92	92	92	92	92	92	92	92	92	92	92	92	92	92	92	92	92	94	88	91	94	91	60	60	84	84	84	81	79	66	69	84	96	96	96	96	94	89	94	92
Dsim_243	68	77	64	28	93	90	92	92	93	93	93	93	92	92	93	93	93	93	92	93	92	93	92	93	92	93	93	88	86	94	94	59	61	84	84	84	81	79	60	62	84	96	96	96	96	94	89	94	92
Dsim_244	71	80	68	30	95	93	95	95	96	96	96	96	95	95	95	95	96	96	95	95	95	95	95	95	95	95	96	91	89	97	94	60	61	87	87	87	83	81	62	65	87	99	99	99	99	97	92	97	95
Dsim_245	71	79	69	29	95	92	95	95	95	95	95	95	95	95	95	95	95	95	95	95	95	95	94	95	95	95	96	91	88	96	93	62	63	86	86	86	83	81	64	66	86	98	98	98	98	96	92	96	95
Dsim_246	71	79	65	31	95	92	95	95	95	95	95	95	95	95	95	95	95	95	94	95	95	95	94	95	95	95	96	91	89	96	93	59	60	86	86	86	83	81	62	64	86	98	98	98	98	96	92	96	95
Dsim_247	70	75	65	25	91	88	91	91	91	91	91	91	91	91	91	91	91	91	90	91	91	91	90	91	91	91	92	86	84	92	89	58	59	82	83	82	79	77	63	66	83	94	94	94	94	92	87	92	91
Dsim_248	71	80	66	30	96	93	96	95	96	96	96	96	95	95	96	96	96	96	95	96	96	96	95	96	96	96	97	91	89	97	94	61	63	87	87	87	84	81	62	65	87	99	99	99	99	97	92	97	96
Dsim_249	71	79	66	31	95	92	95	95	95	95	95	95	95	95	95	95	95	95	94	95	95	95	94	95	95	95	96	91	88	96	93	61	63	86	86	86	83	82	64	66	86	98	98	98	98	96	92	96	95
Dsim_250	69	81	67	29	94	91	94	93	94	94	94	94	94	93	94	94	94	94	93	94	94	94	95	94	94	94	95	89	88	95	92	57	59	85	85	85	82	80	65	64	85	97	97	97	97	95	90	95	94
Dsim_251	69	81	67	29	94	91	94	93	94	94	94	94	94	93	94	94	94	94	93	94	94	94	95	94	94	94	95	89	88	95	92	57	59	85	85	85	82	80	65	64	85	97	97	97	97	95	90	95	94
Dsim_252	71	80	68	30	95	93	95	95	96	96	96	96	95	95	95	95	96	96	95	95	95	95	95	95	95	95	96	91	89	97	94	62	63	86	87	86	83	81	62	64	87	99	99	99	99	97	92	97	95
Dsim_253	70	82	65	31	95	92	95	95	95	95	95	95	95	95	95	95	95	95	94	95	95	95	94	95	95	95	96	91	88	96	93	62	60	86	86	86	83	81	62	64	86	98	98	98	98	96	92	96	98
Dsim_254	74	78	65	31	94	92	94	94	94	94	94	94	94	94	94	94	94	94	94	94	94	94	94	94	94	94	95	95	88	95	93	63	64	85	86	85	82	80	61	63	86	98	98	98	98	96	91	96	94
Dsim_255	68	80	67	28	92	89	92	92	92	92	92	92	92	92	92	92	92	92	92	92	92	92	91	92	92	92	93	88	85	93	90	56	57	84	84	84	80	78	63	65	84	95	95	95	95	93	89	93	92
Dsim_256	73	78	67	28	93	90	93	93	93	93	93	93	93	93	93	93	93	93	93	93	93	93	93	93	93	93	94	89	87	94	92	60	61	85	85	85	81	79	65	68	85	97	97	97	97	95	90	95	93
Dsim_257	72	81	67	29	97	94	97	96	97	97	97	97	96	96	97	97	97	97	96	97	96	97	96	97	96	97	98	92	90	98	95	60	62	88	88	88	84	82	63	65	88	100	100	100	100	98	93	98	97
Dsim_258	72	80	67	29	96	94	96	96	96	96	96	96	96	96	96	96	96	96	96	96	96	96	96	96	96	96	97	92	90	98	95	60	61	87	87	87	84	82	63	66	87	100	100	100	100	98	93	98	96
Dsim_259	71	79	65	30	95	92	95	95	95	95	95	95	95	95	95	95	95	95	95	95	95	95	94	95	95	95	96	91	88	96	97	62	63	86	86	86	83	81	62	64	86	98	98	98	98	96	92	96	95
Dsim_260	72	81	67	29	96	94	96	96	97	97	97	97	96	96	96	96	97	97	96	96	96	96	96	96	96	96	97	92	90	98	95	61	62	87	88	87	84	82	63	65	88	100	100	100	100	98	93	98	96
Dsim_261	68	76	72	33	92	89	92	91	92	92	92	92	92	92	92	92	92	92	91	92	92	92	91	92	92	92	93	87	85	93	90	55	62	83	83	83	80	83	59	61	83	95	95	95	95	93	89	93	92
Dsim_262	69	78	64	30	93	91	93	93	94	93	93	94	93	93	93	93	93	93	93	93	93	93	93	93	93	93	94	89	87	95	92	61	62	85	85	85	81	79	60	62	85	97	97	97	97	95	90	98	93
Dsim_263	72	81	67	29	97	94	96	96	97	97	97	97	96	96	96	96	97	97	96	97	96	97	96	96	96	96	97	92	90	98	95	60	61	87	88	87	84	82	63	65	88	100	100	100	100	98	93	98	97
Dsim_264	65	73	69	28	89	86	89	89	89	89	89	89	89	89	89	89	89	89	89	89	89	89	88	89	89	89	90	85	83	90	87	59	65	81	81	81	80	77	57	59	81	92	92	92	92	90	86	90	88
Dsim_265	70	79	65	31	95	92	95	94	95	95	95	95	95	95	95	95	95	95	94	95	95	95	94	95	95	95	96	90	88	96	93	62	60	86	86	86	83	81	65	67	86	98	98	98	98	96	91	96	95
Dsim_266	73	80	66	30	95	92	95	95	95	95	95	95	95	95	95	95	95	95	95	95	95	95	94	95	95	95	96	91	88	96	93	62	63	86	86	86	83	81	62	64	86	98	98	98	98	97	92	96	95
Dsim_267	71	78	68	30	94	91	94	94	94	94	94	94	94	94	94	94	94	94	93	94	94	94	93	94	94	94	95	90	87	95	92	63	64	85	85	85	82	80	63	65	85	97	97	97	97	95	91	96	94
Dsim_268	59	69	64	36	82	79	82	82	82	82	82	82	82	82	82	82	82	82	81	82	82	82	81	82	82	82	83	81	76	84	81	54	57	74	74	74	71	74	59	61	74	82	82	82	82	80	77	84	79
Dsim_269	72	81	67	29	97	94	97	96	97	97	97	97	96	96	97	97	97	97	96	97	96	97	96	97	96	97	98	92	90	98	95	60	62	88	88	88	84	82	63	65	88	100	100	100	100	98	93	98	97
Dsim_270	72	81	67	29	97	94	97	96	97	97	97	97	96	96	97	97	97	97	96	97	96	97	96	97	97	97	98	92	90	98	95	60	62	88	88	88	84	82	63	65	88	100	100	100	100	98	93	98	97
Dsim_271	44	43	46	67	36	34	36	36	36	36	36	36	36	36	36	36	36	36	36	36	36	36	37	36	36	36	37	34	44	36	39	45	44	39	39	39	38	33	64	64	39	36	36	36	36	38	40	34	39
Dsim_272	72	81	67	29	97	94	97	96	97	97	97	97	96	96	97	97	97	97	96	97	96	97	96	97	97	97	98	92	90	98	95	60	62	88	88	88	84	82	63	65	88	100	100	100	100	98	93	98	97
Dsim_273	73	79	68	30	96	93	95	95	96	96	96	96	95	95	96	96	96	96	95	96	95	96	95	96	95	95	96	91	89	97	94	62	63	87	87	87	83	81	62	67	87	99	99	99	99	97	92	97	95
Dsim_274	74	79	65	28	94	92	94	94	95	95	95	95	94	94	94	94	95	95	94	94	94	95	94	94	94	94	95	90	88	96	93	59	60	86	86	86	82	80	65	67	86	97	97	97	97	96	91	96	94
Dsim_275	72	80	67	29	96	94	96	96	96	96	96	96	96	96	96	96	96	96	96	96	96	96	96	96	96	96	97	92	90	98	95	60	62	87	87	87	84	82	63	65	87	99	99	99	99	97	93	97	96
Dsim_276	73	79	65	28	94	92	94	94	94	94	94	94	94	94	94	94	94	94	94	94	94	94	94	94	94	94	95	90	88	96	93	59	60	85	85	85	82	80	65	67	85	98	98	98	98	96	91	96	94
Dsim_277	71	79	69	29	95	92	95	95	95	95	95	95	95	95	95	95	95	95	95	95	95	95	94	95	95	95	96	91	88	96	93	62	63	86	86	86	83	81	64	66	86	98	98	98	98	96	92	96	95
Dsim_278	71	79	69	29	95	92	95	95	95	95	95	95	95	95	95	95	95	95	95	95	95	95	94	95	95	95	96	91	88	96	93	62	63	86	87	86	83	81	64	66	87	98	98	98	98	96	92	96	95
Dsim_279	70	79	65	30	95	92	95	95	95	95	95	95	95	95	95	95	95	95	94	95	95	95	94	95	95	95	96	90	88	96	93	59	60	86	86	86	83	81	61	64	86	98	98	98	98	96	92	96	95
Dsim_280	73	79	65	31	95	92	95	95	95	95	95	95	95	95	95	95	95	95	94	95	95	95	94	95	95	95	96	91	88	96	93	62	63	86	87	86	83	81	62	64	87	98	98	98	98	96	92	96	95
Dsim_281	69	78	70	30	91	88	90	90	91	91	91	91	90	90	91	91	91	91	90	91	90	91	90	91	90	91	91	86	86	92	89	64	65	82	82	82	79	79	60	62	82	94	94	94	94	92	87	91	94
Dsim_282	71	82	68	30	95	93	95	95	95	95	95	95	95	95	95	95	95	95	95	95	95	95	95	95	95	95	96	91	89	97	94	59	61	86	86	86	83	81	64	67	86	99	99	99	99	97	92	97	95
Dsim_283	70	79	67	31	95	92	94	94	95	95	95	95	94	94	95	94	95	95	94	95	94	95	94	95	94	94	95	90	88	96	93	63	64	86	86	86	83	80	61	64	86	98	98	98	98	96	91	96	94
Dsim_284	68	80	62	29	92	89	92	92	92	92	92	92	92	92	92	92	92	92	91	92	92	92	93	92	92	92	93	88	88	93	90	63	65	83	83	83	80	78	63	61	83	95	95	95	95	93	89	93	92
Dsim_285	67	79	63	30	91	88	91	91	91	91	91	91	91	91	91	91	91	91	90	91	91	91	92	91	91	91	92	87	87	92	89	62	64	82	82	82	79	77	62	60	82	94	94	94	94	92	88	92	91
Dsim_286	68	77	67	34	93	90	92	92	93	93	93	93	92	93	93	92	93	93	92	93	92	93	92	92	92	92	94	91	91	94	91	56	57	84	84	84	81	79	65	67	84	95	95	95	95	93	89	93	92
Dsim_287	72	75	64	29	90	87	90	90	90	90	90	90	90	90	90	90	90	90	89	90	90	90	89	90	90	90	91	86	83	91	88	54	56	81	81	81	81	77	61	63	81	93	93	93	93	91	86	91	92
Dsim_288	70	78	66	27	94	91	94	93	94	94	94	94	93	93	94	94	94	94	93	94	94	94	93	94	94	94	95	89	87	95	92	57	59	85	85	85	82	81	61	63	85	97	97	97	97	95	90	95	94
Dsim_289	69	77	70	26	94	91	94	93	94	94	94	94	93	93	94	94	94	94	93	94	93	94	93	94	94	94	94	89	87	95	92	64	65	85	85	85	82	81	61	63	85	96	97	97	96	95	90	94	93
Dsim_290	72	74	68	30	90	87	90	90	90	90	90	90	90	90	90	90	90	90	90	90	90	90	89	90	90	90	91	86	84	91	88	61	62	82	82	82	79	78	63	66	82	93	93	93	93	91	92	91	90
Dsim_291	71	78	64	27	93	90	93	93	93	93	93	93	93	93	93	93	93	93	93	93	93	93	92	93	93	93	94	89	86	94	91	61	62	84	85	84	81	79	61	63	85	96	96	96	96	94	96	94	93
Dsim_292	70	74	66	32	89	87	89	89	90	89	90	90	89	89	89	89	89	89	89	89	89	89	89	89	89	89	90	85	83	91	88	58	58	82	82	82	78	76	63	65	82	93	93	93	93	91	86	91	89
Dsim_293	70	78	64	31	94	91	94	94	94	94	94	94	94	94	94	94	94	94	94	94	94	94	93	94	94	94	95	90	87	95	92	60	60	85	85	85	82	80	62	64	85	97	97	97	97	95	91	99	94
Dsim_294	68	79	62	25	91	88	91	90	91	91	91	91	90	90	91	91	91	91	90	91	90	91	90	91	91	91	91	86	84	92	89	60	61	82	82	82	79	77	62	60	82	94	94	94	94	92	89	92	90
Dsim_295	70	78	68	30	94	92	94	94	95	95	95	95	94	94	94	94	95	95	94	94	94	94	94	94	94	94	95	90	88	96	93	61	62	86	86	86	83	80	62	64	86	98	98	98	98	96	91	96	94
Dsim_296	69	78	65	29	94	91	94	93	94	94	94	94	93	93	94	94	94	94	93	94	93	94	93	94	93	94	94	89	87	95	92	59	60	85	85	85	82	79	60	63	85	97	97	97	97	95	90	98	93
Dsim_297	70	79	66	30	94	92	94	94	95	95	95	95	94	94	94	94	95	95	94	94	94	95	94	94	94	94	95	90	88	96	93	60	61	86	86	86	82	80	61	63	86	98	98	98	98	96	91	99	94
Dsim_298	70	78	71	32	89	86	89	89	89	89	89	89	89	89	89	89	89	89	88	89	89	89	88	89	89	89	90	84	82	90	87	58	59	80	81	80	77	75	66	70	81	92	92	92	92	90	85	90	89
Dsim_299	71	81	68	30	96	93	96	96	96	96	96	96	96	96	96	96	96	96	95	96	96	96	95	96	96	96	97	92	89	97	94	60	61	87	87	87	84	82	64	66	87	99	99	99	99	97	93	97	96
Dsim_300	68	78	68	33	87	85	87	87	88	88	88	88	87	87	87	87	88	88	87	87	87	87	87	87	87	87	88	83	81	89	86	61	62	79	80	79	76	74	67	67	80	91	91	91	91	91	84	89	87
Dsim_301	64	74	73	24	87	84	87	87	87	87	87	87	87	87	87	87	87	87	87	87	87	87	86	87	87	87	88	82	80	88	85	60	61	79	79	79	76	75	59	59	79	90	90	90	90	88	83	88	86
Dsim_302	61	77	65	33	85	82	85	84	85	85	85	85	84	84	85	85	85	85	84	85	84	85	84	85	85	85	85	80	78	86	86	60	66	77	77	77	76	76	57	55	77	88	88	88	88	86	86	86	84
Dsim_303	65	74	62	36	89	86	88	88	89	89	89	89	88	88	89	88	89	89	88	89	88	89	88	89	88	88	90	85	87	90	87	60	57	80	81	80	77	75	70	73	81	91	91	91	91	89	85	89	88
Dsim_304	67	74	61	35	89	92	89	89	89	89	89	89	89	89	89	89	89	89	89	89	89	89	90	89	89	89	91	85	88	90	87	56	57	81	81	81	83	81	61	64	81	92	92	92	92	90	86	90	90
Dsim_305	69	76	72	36	88	86	88	88	89	89	89	89	88	89	88	88	89	89	88	89	88	88	88	88	88	88	89	91	82	90	87	59	57	80	81	80	77	76	56	58	81	91	91	91	91	89	84	89	88
Dsim_306	71	75	64	36	90	87	90	90	90	90	90	90	90	90	90	90	90	90	89	90	90	90	89	90	90	90	92	86	88	91	88	58	60	82	82	82	78	77	62	65	82	93	93	93	93	91	87	91	90
Dsuz_307	72	81	67	29	97	94	97	96	97	97	97	97	96	96	97	97	97	97	96	97	96	97	96	97	97	97	98	92	90	98	95	60	62	88	88	88	84	82	63	65	88	100	100	100	100	98	93	98	97
Dsuz_308	71	76	62	34	91	89	91	91	91	91	91	91	91	91	91	91	91	91	91	91	91	91	91	91	91	91	93	92	90	92	90	60	61	83	83	83	80	77	63	66	83	95	95	95	95	93	88	93	91
Dnov_309	72	81	67	29	97	94	96	96	97	97	97	97	96	96	96	96	97	97	96	97	96	97	96	96	96	96	98	93	91	99	96	61	62	88	88	88	85	83	64	66	88	98	98	98	98	96	91	96	94
Dnov_310	72	80	67	29	96	94	96	96	96	96	96	96	96	96	96	96	96	96	96	96	96	96	96	96	96	96	98	93	90	98	95	61	62	88	88	88	84	82	63	66	88	98	98	98	98	96	91	96	95
Dnov_311	72	80	67	30	96	93	96	96	96	96	96	96	96	96	96	96	96	96	95	96	96	96	95	96	96	96	98	92	90	98	95	61	62	87	87	87	84	82	63	65	87	98	98	98	98	96	91	95	94
Hvit_312	81	71	63	33	85	83	85	85	85	85	85	85	85	85	85	85	85	85	85	85	85	85	85	85	85	85	85	80	78	85	83	53	54	94	94	94	89	88	67	70	94	85	85	85	85	83	79	83	82
Hvit_313	81	71	63	33	85	83	85	85	85	85	85	85	85	85	85	85	85	85	85	85	85	85	85	85	85	85	85	80	78	85	83	53	54	94	94	94	89	88	67	70	94	85	85	85	85	83	79	83	82
Lalb_314	72	81	67	29	97	94	97	97	97	97	97	97	97	97	97	97	97	97	96	97	97	97	96	97	97	97	98	93	90	98	95	61	62	88	88	88	85	83	63	66	88	98	98	98	98	96	92	96	95
Lalb_315	72	80	67	29	97	94	97	97	97	97	97	97	97	97	97	97	97	97	96	97	97	97	96	97	97	97	98	93	90	98	96	61	62	88	88	88	85	83	64	66	88	98	98	98	98	96	92	96	95
Lalb_316	71	82	69	28	96	93	95	95	96	96	96	96	95	95	96	96	96	96	95	96	95	96	95	96	95	95	97	91	89	97	94	60	61	87	87	87	84	81	65	64	87	97	97	97	97	95	90	95	94
Lalb_317	68	82	68	31	92	90	92	92	92	92	92	92	92	92	92	92	92	92	92	92	92	92	91	92	92	92	93	88	86	93	90	60	61	83	83	83	81	79	67	66	83	93	93	93	93	91	87	91	90
Lalb_318	69	76	66	34	92	90	92	92	93	92	93	93	92	92	92	92	92	92	92	92	92	92	92	93	92	92	94	91	88	94	91	61	59	84	84	84	81	79	65	67	84	93	93	93	93	91	87	91	90
Lalb_319	66	80	70	36	87	84	87	87	87	87	87	87	87	86	87	87	87	87	86	87	87	87	86	87	87	87	88	86	80	88	85	55	52	79	79	79	76	74	67	69	79	88	88	88	88	89	81	86	85
Ltri_320	45	38	55	62	42	45	43	42	42	42	42	42	43	42	42	42	42	42	42	42	43	42	42	42	43	42	43	44	41	43	42	48	47	46	47	46	50	53	49	52	47	42	42	42	42	43	47	41	40
Turt_321	79	74	61	29	88	85	88	88	88	88	88	88	88	88	88	88	88	88	87	88	88	88	87	88	88	88	87	83	81	88	85	55	56	97	97	97	93	91	70	72	97	87	87	87	87	86	82	85	84
[truncated: 272 more columns]

## Sheet: Sheet2
Supplementary table 4.2 Supergroup A and B Wolbachia identifiers
id	wolb_ids
Aalb_001	Aedes-albopictus.WOLB1128
Cobl_002	Camponotus-obliquus.WOLB1006
Cobs_003	Cardiocondyla-obscurior.WOLB0001
Dcoc_004	Dactylopius-coccus.WOLB1009
Dvir_005	Diabrotica-virgifera.WOLB0013
Dvir_006	Diabrotica-virgifera.WOLB0014
Dvir_007	Diabrotica-virgifera.WOLB0015
Dvir_008	Diabrotica-virgifera.WOLB0016
Dvir_009	Diabrotica-virgifera.WOLB0017
Dvir_010	Diabrotica-virgifera.WOLB0018
Dvir_011	Diabrotica-virgifera.WOLB0019
Dvir_012	Diabrotica-virgifera.WOLB0020
Dvir_013	Diabrotica-virgifera.WOLB0021
Dvir_014	Diabrotica-virgifera.WOLB0022
Dvir_015	Diabrotica-virgifera.WOLB0023
Dvir_016	Diabrotica-virgifera.WOLB0024
Dvir_017	Diabrotica-virgifera.WOLB0025
Dvir_018	Diabrotica-virgifera.WOLB0026
Dvir_019	Diabrotica-virgifera.WOLB0027
Dvir_020	Diabrotica-virgifera.WOLB0028
Dvir_021	Diabrotica-virgifera.WOLB0029
Dvir_022	Diabrotica-virgifera.WOLB0030
Dvir_023	Diabrotica-virgifera.WOLB0031
Dvir_024	Diabrotica-virgifera.WOLB0032
Dvir_025	Diabrotica-virgifera.WOLB0033
Dvir_026	Diabrotica-virgifera.WOLB0034
Dall_027	Diachasma-alloeum.WOLB1001
Dall_028	Diachasma-alloeum.WOLB1002
Dall_029	Diachasma-alloeum.WOLB1003
Dall_030	Diachasma-alloeum.WOLB1004
Dall_031	Diachasma-alloeum.WOLB1162
Dall_032	Diachasma-alloeum.WOLB1163
Dall_033	Diachasma-alloeum.WOLB1164
Dcit_034	Diaphorina-citri.WOLB0044|Diaphorina-citri.WOLB1010
Dcit_035	Diaphorina-citri.WOLB0045|Diaphorina-citri.WOLB0046
Dcit_036	Diaphorina-citri.WOLB0047
Dcit_037	Diaphorina-citri.WOLB0048
Dcit_038	Diaphorina-citri.WOLB0049
Dcit_039	Diaphorina-citri.WOLB0050
Dcit_040	Diaphorina-citri.WOLB0051
Dcit_041	Diaphorina-citri.WOLB0052
Dana_042	Drosophila-ananassae.WOLB0056|Drosophila-ananassae.WOLB0057
Dana_043	Drosophila-ananassae.WOLB0058
DrosMulti_044	Drosophila-ananassae.WOLB0059|Drosophila-ananassae.WOLB0060|Drosophila-simulans.WOLB0718|Drosophila-simulans.WOLB0719|Drosophila-simulans.WOLB0720|Drosophila-simulans.WOLB0721|Drosophila-simulans.WOLB0722|Drosophila-simulans.WOLB0723|Drosophila-simulans.WOLB0724|Drosophila-simulans.WOLB0725|Drosophila-simulans.WOLB0726|Drosophila-simulans.WOLB0727|Drosophila-simulans.WOLB0728|Drosophila-simulans.…
Dana_045	Drosophila-ananassae.WOLB0061
Dana_046	Drosophila-ananassae.WOLB0062
Dana_047	Drosophila-ananassae.WOLB0063
Dana_048	Drosophila-ananassae.WOLB0064
Dana_049	Drosophila-ananassae.WOLB0065
Dana_050	Drosophila-ananassae.WOLB0066
Dana_051	Drosophila-ananassae.WOLB0067
DrosMulti_052	Drosophila-ananassae.WOLB0068|Drosophila-ananassae.WOLB0071|Drosophila-ananassae.WOLB0072|Drosophila-ananassae.WOLB0074
Dana_053	Drosophila-ananassae.WOLB0069
Dana_054	Drosophila-ananassae.WOLB0070
Dana_055	Drosophila-ananassae.WOLB0073
Dana_056	Drosophila-ananassae.WOLB0075
Dana_057	Drosophila-ananassae.WOLB0076
Dana_058	Drosophila-ananassae.WOLB1017
Dmau_059	Drosophila-mauritiana.WOLB0077
Dmau_060	Drosophila-mauritiana.WOLB0078
Dmau_061	Drosophila-mauritiana.WOLB0079
Dmau_062	Drosophila-mauritiana.WOLB0080
DrosMulti_063	Drosophila-melanogaster.WOLB0081|Drosophila-melanogaster.WOLB0084|Drosophila-melanogaster.WOLB0087|Drosophila-melanogaster.WOLB0116|Drosophila-melanogaster.WOLB0123|Drosophila-melanogaster.WOLB0242|Drosophila-melanogaster.WOLB0243|Drosophila-melanogaster.WOLB0389|Drosophila-melanogaster.WOLB0390|Drosophila-melanogaster.WOLB0627
DrosMulti_064	Drosophila-melanogaster.WOLB0082|Drosophila-melanogaster.WOLB0086|Drosophila-melanogaster.WOLB0088|Drosophila-melanogaster.WOLB0089|Drosophila-melanogaster.WOLB0093|Drosophila-melanogaster.WOLB0094|Drosophila-melanogaster.WOLB0095|Drosophila-melanogaster.WOLB0096|Drosophila-melanogaster.WOLB0097|Drosophila-melanogaster.WOLB0111|Drosophila-melanogaster.WOLB0112|Drosophila-melanogaster.WOLB0113|Dro…
DrosMulti_065	Drosophila-melanogaster.WOLB0083|Drosophila-melanogaster.WOLB0085|Drosophila-melanogaster.WOLB0090|Drosophila-melanogaster.WOLB0091|Drosophila-melanogaster.WOLB0099|Drosophila-melanogaster.WOLB0100|Drosophila-melanogaster.WOLB0101|Drosophila-melanogaster.WOLB0102|Drosophila-melanogaster.WOLB0103|Drosophila-melanogaster.WOLB0104|Drosophila-melanogaster.WOLB0105|Drosophila-melanogaster.WOLB0106|Dro…
Dmel_066	Drosophila-melanogaster.WOLB0092
Dmel_067	Drosophila-melanogaster.WOLB0098
Dmel_068	Drosophila-melanogaster.WOLB0124|Drosophila-melanogaster.WOLB0374
Dmel_069	Drosophila-melanogaster.WOLB0193
Dmel_070	Drosophila-melanogaster.WOLB0199
Dmel_071	Drosophila-melanogaster.WOLB0223
Dmel_072	Drosophila-melanogaster.WOLB0261
Dmel_073	Drosophila-melanogaster.WOLB0262
Dmel_074	Drosophila-melanogaster.WOLB0296
DrosMulti_075	Drosophila-melanogaster.WOLB0326|Drosophila-melanogaster.WOLB0327|Drosophila-melanogaster.WOLB0328|Drosophila-melanogaster.WOLB0413|Drosophila-melanogaster.WOLB0414|Drosophila-melanogaster.WOLB0449
Dmel_076	Drosophila-melanogaster.WOLB0332
Dmel_077	Drosophila-melanogaster.WOLB0334
Dmel_078	Drosophila-melanogaster.WOLB0338
Dmel_079	Drosophila-melanogaster.WOLB0340
Dmel_080	Drosophila-melanogaster.WOLB0343
Dmel_081	Drosophila-melanogaster.WOLB0345
Dmel_082	Drosophila-melanogaster.WOLB0346
Dmel_083	Drosophila-melanogaster.WOLB0354
Dmel_084	Drosophila-melanogaster.WOLB0361
Dmel_085	Drosophila-melanogaster.WOLB0376
Dmel_086	Drosophila-melanogaster.WOLB0401
Dmel_087	Drosophila-melanogaster.WOLB0427
Dmel_088	Drosophila-melanogaster.WOLB0428
Dmel_089	Drosophila-melanogaster.WOLB0443
Dmel_090	Drosophila-melanogaster.WOLB0446
Dmel_091	Drosophila-melanogaster.WOLB0467
Dmel_092	Drosophila-melanogaster.WOLB0477
DrosMulti_093	Drosophila-melanogaster.WOLB0483|Drosophila-melanogaster.WOLB0490|Drosophila-melanogaster.WOLB0521|Drosophila-melanogaster.WOLB0604
Dmel_094	Drosophila-melanogaster.WOLB0487
Dmel_095	Drosophila-melanogaster.WOLB0488
Dmel_096	Drosophila-melanogaster.WOLB0489
Dmel_097	Drosophila-melanogaster.WOLB0495
Dmel_098	Drosophila-melanogaster.WOLB0498
Dmel_099	Drosophila-melanogaster.WOLB0505|Drosophila-melanogaster.WOLB0565
Dmel_100	Drosophila-melanogaster.WOLB0506
Dmel_101	Drosophila-melanogaster.WOLB0516
Dmel_102	Drosophila-melanogaster.WOLB0520
Dmel_103	Drosophila-melanogaster.WOLB0525
Dmel_104	Drosophila-melanogaster.WOLB0528
Dmel_105	Drosophila-melanogaster.WOLB0529
Dmel_106	Drosophila-melanogaster.WOLB0533|Drosophila-melanogaster.WOLB0611|Drosophila-melanogaster.WOLB0612
Dmel_107	Drosophila-melanogaster.WOLB0541
Dmel_108	Drosophila-melanogaster.WOLB0549
Dmel_109	Drosophila-melanogaster.WOLB0553
Dmel_110	Drosophila-melanogaster.WOLB0567
Dmel_111	Drosophila-melanogaster.WOLB0573
Dmel_112	Drosophila-melanogaster.WOLB0577
Dmel_113	Drosophila-melanogaster.WOLB0579
Dmel_114	Drosophila-melanogaster.WOLB0581
Dmel_115	Drosophila-melanogaster.WOLB0588
Dmel_116	Drosophila-melanogaster.WOLB0601
Dmel_117	Drosophila-melanogaster.WOLB0607
Dmel_118	Drosophila-melanogaster.WOLB0614
Dmel_119	Drosophila-melanogaster.WOLB0615
Dmel_120	Drosophila-melanogaster.WOLB0616
Dmel_121	Drosophila-melanogaster.WOLB0618
Dmel_122	Drosophila-melanogaster.WOLB0620
Dmel_123	Drosophila-melanogaster.WOLB0621
Dmel_124	Drosophila-melanogaster.WOLB0623
Dmel_125	Drosophila-melanogaster.WOLB0626
Dmel_126	Drosophila-melanogaster.WOLB0631
Dmel_127	Drosophila-melanogaster.WOLB0632
Dmel_128	Drosophila-melanogaster.WOLB0635
Dmel_129	Drosophila-melanogaster.WOLB0636
Dmel_130	Drosophila-melanogaster.WOLB0637
Dmel_131	Drosophila-melanogaster.WOLB0639
Dmel_132	Drosophila-melanogaster.WOLB0640
Dmel_133	Drosophila-melanogaster.WOLB0641
Dmel_134	Drosophila-melanogaster.WOLB0642
Dmel_135	Drosophila-melanogaster.WOLB0643
Dmel_136	Drosophila-melanogaster.WOLB0645
Dmel_137	Drosophila-melanogaster.WOLB0646
Dmel_138	Drosophila-melanogaster.WOLB0648
Dmel_139	Drosophila-melanogaster.WOLB0649
Dmel_140	Drosophila-melanogaster.WOLB0650
Dmel_141	Drosophila-melanogaster.WOLB0651
Dmel_142	Drosophila-melanogaster.WOLB0655
Dmel_143	Drosophila-melanogaster.WOLB0656
Dmel_144	Drosophila-melanogaster.WOLB0657
Dmel_145	Drosophila-melanogaster.WOLB0658
Dmel_146	Drosophila-melanogaster.WOLB0659
Dmel_147	Drosophila-melanogaster.WOLB0660
Dmel_148	Drosophila-melanogaster.WOLB0661
Dmel_149	Drosophila-melanogaster.WOLB0662
Dmel_150	Drosophila-melanogaster.WOLB0663
Dmel_151	Drosophila-melanogaster.WOLB0664
Dmel_152	Drosophila-melanogaster.WOLB0665
Dmel_153	Drosophila-melanogaster.WOLB0666
Dmel_154	Drosophila-melanogaster.WOLB0667
Dmel_155	Drosophila-melanogaster.WOLB0668
Dmel_156	Drosophila-melanogaster.WOLB0669
Dmel_157	Drosophila-melanogaster.WOLB0670
Dmel_158	Drosophila-melanogaster.WOLB0671
Dmel_159	Drosophila-melanogaster.WOLB0672
Dmel_160	Drosophila-melanogaster.WOLB0673
Dmel_161	Drosophila-melanogaster.WOLB0674
Dmel_162	Drosophila-melanogaster.WOLB0675
Dmel_163	Drosophila-melanogaster.WOLB0676
Dmel_164	Drosophila-melanogaster.WOLB0677
Dmel_165	Drosophila-melanogaster.WOLB0678
Dmel_166	Drosophila-melanogaster.WOLB0679
Dmel_167	Drosophila-melanogaster.WOLB0680
Dmel_168	Drosophila-melanogaster.WOLB0681
Dmel_169	Drosophila-melanogaster.WOLB0682
Dmel_170	Drosophila-melanogaster.WOLB0683
Dmel_171	Drosophila-melanogaster.WOLB0684
Dmel_172	Drosophila-melanogaster.WOLB0685
Dmel_173	Drosophila-melanogaster.WOLB0686
Dmel_174	Drosophila-melanogaster.WOLB0687
Dmel_175	Drosophila-melanogaster.WOLB0688
Dmel_176	Drosophila-melanogaster.WOLB0689
Dmel_177	Drosophila-melanogaster.WOLB0690
Dmel_178	Drosophila-melanogaster.WOLB0691
Dmel_179	Drosophila-melanogaster.WOLB0692
Dmel_180	Drosophila-melanogaster.WOLB0693
Dmel_181	Drosophila-melanogaster.WOLB0694
Dmel_182	Drosophila-melanogaster.WOLB0695
Dmel_183	Drosophila-melanogaster.WOLB0696
Dmel_184	Drosophila-melanogaster.WOLB0697
Dmel_185	Drosophila-melanogaster.WOLB0698
Dmel_186	Drosophila-melanogaster.WOLB0699
Dmel_187	Drosophila-melanogaster.WOLB0700
Dmel_188	Drosophila-melanogaster.WOLB0701
Dmel_189	Drosophila-melanogaster.WOLB0702
Dmel_190	Drosophila-melanogaster.WOLB0703
Dmel_191	Drosophila-melanogaster.WOLB0704
Dmel_192	Drosophila-melanogaster.WOLB1021
Dmel_193	Drosophila-melanogaster.WOLB1029
Dmel_194	Drosophila-melanogaster.WOLB1032
Dmel_195	Drosophila-melanogaster.WOLB1038
Dmel_196	Drosophila-melanogaster.WOLB1039
Dmel_197	Drosophila-melanogaster.WOLB1040
Dmel_198	Drosophila-melanogaster.WOLB1041
Dmel_199	Drosophila-melanogaster.WOLB1042
Dmel_200	Drosophila-melanogaster.WOLB1043
Dmel_201	Drosophila-melanogaster.WOLB1044
Dmel_202	Drosophila-melanogaster.WOLB1045
Dmel_203	Drosophila-melanogaster.WOLB1046
Dmel_204	Drosophila-melanogaster.WOLB1047
Dmel_205	Drosophila-melanogaster.WOLB1048
Dmel_206	Drosophila-melanogaster.WOLB1049
Dmel_207	Drosophila-melanogaster.WOLB1050
Dmel_208	Drosophila-melanogaster.WOLB1051
Dmel_209	Drosophila-melanogaster.WOLB1052
Dmel_210	Drosophila-melanogaster.WOLB1053
Dmel_211	Drosophila-melanogaster.WOLB1054
Dmel_212	Drosophila-melanogaster.WOLB1055
Dmel_213	Drosophila-melanogaster.WOLB1057
Dmel_214	Drosophila-melanogaster.WOLB1058
Dmel_215	Drosophila-melanogaster.WOLB1059
DrosMulti_216	Drosophila-simulans.WOLB0707|Drosophila-simulans.WOLB0708|Drosophila-simulans.WOLB0710|Drosophila-simulans.WOLB0711|Drosophila-simulans.WOLB0712|Drosophila-simulans.WOLB0713|Drosophila-simulans.WOLB0714|Drosophila-simulans.WOLB0715
Dsim_217	Drosophila-simulans.WOLB0709
Dsim_218	Drosophila-simulans.WOLB0716
Dsim_219	Drosophila-simulans.WOLB0717
DrosMulti_220	Drosophila-simulans.WOLB0748|Drosophila-simulans.WOLB0809|Drosophila-simulans.WOLB0810|Drosophila-simulans.WOLB0829|Drosophila-simulans.WOLB0830|Drosophila-simulans.WOLB0905|Drosophila-simulans.WOLB0906
Dsim_221	Drosophila-simulans.WOLB0761|Drosophila-simulans.WOLB0768
Dsim_222	Drosophila-simulans.WOLB0782
DrosMulti_223	Drosophila-simulans.WOLB0789|Drosophila-simulans.WOLB0790|Drosophila-simulans.WOLB0817|Drosophila-simulans.WOLB0818|Drosophila-simulans.WOLB0827|Drosophila-simulans.WOLB0828|Drosophila-simulans.WOLB0865|Drosophila-simulans.WOLB0866
Dsim_224	Drosophila-simulans.WOLB0819|Drosophila-simulans.WOLB0820
Dsim_225	Drosophila-simulans.WOLB0833|Drosophila-simulans.WOLB0834
Dsim_226	Drosophila-simulans.WOLB0845|Drosophila-simulans.WOLB0846
Dsim_227	Drosophila-simulans.WOLB0847|Drosophila-simulans.WOLB0856
Dsim_228	Drosophila-simulans.WOLB0848|Drosophila-simulans.WOLB0849
Dsim_229	Drosophila-simulans.WOLB0852|Drosophila-simulans.WOLB0853
Dsim_230	Drosophila-simulans.WOLB0859|Drosophila-simulans.WOLB0860
Dsim_231	Drosophila-simulans.WOLB0861|Drosophila-simulans.WOLB0864
Dsim_232	Drosophila-simulans.WOLB0867|Drosophila-simulans.WOLB0873
Dsim_233	Drosophila-simulans.WOLB0869|Drosophila-simulans.WOLB0870
Dsim_234	Drosophila-simulans.WOLB0871|Drosophila-simulans.WOLB0872
Dsim_235	Drosophila-simulans.WOLB0874|Drosophila-simulans.WOLB0875
Dsim_236	Drosophila-simulans.WOLB0876|Drosophila-simulans.WOLB0877
Dsim_237	Drosophila-simulans.WOLB0881
Dsim_238	Drosophila-simulans.WOLB0882|Drosophila-simulans.WOLB0883
Dsim_239	Drosophila-simulans.WOLB0886|Drosophila-simulans.WOLB0887
Dsim_240	Drosophila-simulans.WOLB0890|Drosophila-simulans.WOLB0891
Dsim_241	Drosophila-simulans.WOLB0894|Drosophila-simulans.WOLB0895
Dsim_242	Drosophila-simulans.WOLB0896|Drosophila-simulans.WOLB0897
Dsim_243	Drosophila-simulans.WOLB0898|Drosophila-simulans.WOLB0901
Dsim_244	Drosophila-simulans.WOLB0899|Drosophila-simulans.WOLB0900
Dsim_245	Drosophila-simulans.WOLB0902|Drosophila-simulans.WOLB0903
Dsim_246	Drosophila-simulans.WOLB0904|Drosophila-simulans.WOLB0907
Dsim_247	Drosophila-simulans.WOLB0908|Drosophila-simulans.WOLB0909
Dsim_248	Drosophila-simulans.WOLB0910|Drosophila-simulans.WOLB0911
Dsim_249	Drosophila-simulans.WOLB0912|Drosophila-simulans.WOLB0913
Dsim_250	Drosophila-simulans.WOLB0914
Dsim_251	Drosophila-simulans.WOLB0915
Dsim_252	Drosophila-simulans.WOLB0916|Drosophila-simulans.WOLB0917
Dsim_253	Drosophila-simulans.WOLB0918|Drosophila-simulans.WOLB0919
Dsim_254	Drosophila-simulans.WOLB0920|Drosophila-simulans.WOLB0923
Dsim_255	Drosophila-simulans.WOLB0921|Drosophila-simulans.WOLB0922
Dsim_256	Drosophila-simulans.WOLB0924|Drosophila-simulans.WOLB0925
Dsim_257	Drosophila-simulans.WOLB0926|Drosophila-simulans.WOLB0927
Dsim_258	Drosophila-simulans.WOLB0928|Drosophila-simulans.WOLB0929
Dsim_259	Drosophila-simulans.WOLB0930|Drosophila-simulans.WOLB0931
Dsim_260	Drosophila-simulans.WOLB0932|Drosophila-simulans.WOLB0933
Dsim_261	Drosophila-simulans.WOLB0934|Drosophila-simulans.WOLB0935
Dsim_262	Drosophila-simulans.WOLB0938|Drosophila-simulans.WOLB0941
Dsim_263	Drosophila-simulans.WOLB0942|Drosophila-simulans.WOLB0945
Dsim_264	Drosophila-simulans.WOLB0943|Drosophila-simulans.WOLB0944
Dsim_265	Drosophila-simulans.WOLB0946|Drosophila-simulans.WOLB1074
Dsim_266	Drosophila-simulans.WOLB0947|Drosophila-simulans.WOLB0948
Dsim_267	Drosophila-simulans.WOLB0949|Drosophila-simulans.WOLB0950
Dsim_268	Drosophila-simulans.WOLB0951
Dsim_269	Drosophila-simulans.WOLB1060
Dsim_270	Drosophila-simulans.WOLB1061
Dsim_271	Drosophila-simulans.WOLB1062
Dsim_272	Drosophila-simulans.WOLB1063|Drosophila-simulans.WOLB1064
Dsim_273	Drosophila-simulans.WOLB1065|Drosophila-simulans.WOLB1066
Dsim_274	Drosophila-simulans.WOLB1069
Dsim_275	Drosophila-simulans.WOLB1070|Drosophila-simulans.WOLB1071
Dsim_276	Drosophila-simulans.WOLB1072
Dsim_277	Drosophila-simulans.WOLB1073
Dsim_278	Drosophila-simulans.WOLB1075
Dsim_279	Drosophila-simulans.WOLB1076|Drosophila-simulans.WOLB1077
Dsim_280	Drosophila-simulans.WOLB1080|Drosophila-simulans.WOLB1081
Dsim_281	Drosophila-simulans.WOLB1082|Drosophila-simulans.WOLB1083
Dsim_282	Drosophila-simulans.WOLB1084|Drosophila-simulans.WOLB1087
Dsim_283	Drosophila-simulans.WOLB1085|Drosophila-simulans.WOLB1086
Dsim_284	Drosophila-simulans.WOLB1088
Dsim_285	Drosophila-simulans.WOLB1089
Dsim_286	Drosophila-simulans.WOLB1090|Drosophila-simulans.WOLB1091
Dsim_287	Drosophila-simulans.WOLB1092|Drosophila-simulans.WOLB1093
Dsim_288	Drosophila-simulans.WOLB1094|Drosophila-simulans.WOLB1095
Dsim_289	Drosophila-simulans.WOLB1096|Drosophila-simulans.WOLB1097
Dsim_290	Drosophila-simulans.WOLB1098|Drosophila-simulans.WOLB1099
Dsim_291	Drosophila-simulans.WOLB1100|Drosophila-simulans.WOLB1103
Dsim_292	Drosophila-simulans.WOLB1101|Drosophila-simulans.WOLB1102
Dsim_293	Drosophila-simulans.WOLB1104|Drosophila-simulans.WOLB1105
Dsim_294	Drosophila-simulans.WOLB1106|Drosophila-simulans.WOLB1107
Dsim_295	Drosophila-simulans.WOLB1108|Drosophila-simulans.WOLB1109
Dsim_296	Drosophila-simulans.WOLB1110
Dsim_297	Drosophila-simulans.WOLB1111
Dsim_298	Drosophila-simulans.WOLB1112|Drosophila-simulans.WOLB1113
Dsim_299	Drosophila-simulans.WOLB1114|Drosophila-simulans.WOLB1115
Dsim_300	Drosophila-simulans.WOLB1116|Drosophila-simulans.WOLB1117
Dsim_301	Drosophila-simulans.WOLB1118
Dsim_302	Drosophila-simulans.WOLB1119
Dsim_303	Drosophila-simulans.WOLB1120|Drosophila-simulans.WOLB1121
Dsim_304	Drosophila-simulans.WOLB1122|Drosophila-simulans.WOLB1123
Dsim_305	Drosophila-simulans.WOLB1124|Drosophila-simulans.WOLB1127
Dsim_306	Drosophila-simulans.WOLB1125|Drosophila-simulans.WOLB1126
Dsuz_307	Drosophila-suzukii.WOLB0952
Dsuz_308	Drosophila-suzukii.WOLB0953
Dnov_309	Dufourea-novaeangliae.WOLB0002
Dnov_310	Dufourea-novaeangliae.WOLB0003|Dufourea-novaeangliae.WOLB0004
Dnov_311	Dufourea-novaeangliae.WOLB0005
Hvit_312	Homalodisca-vitripennis.WOLB0956
Hvit_313	Homalodisca-vitripennis.WOLB0957
Lalb_314	Lasioglossum-albipes.WOLB0006
Lalb_315	Lasioglossum-albipes.WOLB0007
Lalb_316	Lasioglossum-albipes.WOLB0008
Lalb_317	Lasioglossum-albipes.WOLB0009
Lalb_318	Lasioglossum-albipes.WOLB0010
Lalb_319	Lasioglossum-albipes.WOLB0011
Ltri_320	Liriomyza-trifolii.WOLB1012
Turt_321	Tetranychus-urticae.WOLB0958
